# Prediction of stroke-associated pneumonia risk in stroke patients based on interpretable machine learning

Chunbiao Li<sup>1#</sup>, Ting Wang<sup>2\*</sup>, Juan Yuan<sup>1#</sup>, Linli Yuan<sup>1</sup>, Min You<sup>2</sup>

1. College of Nursing, Anhui University of Traditional Chinese Medicine, Hefei City, Anhui Province, China

2. Department of Nursing, The Second Affiliated Hospital of Anhui University of Traditional Chinese Medicine, Hefei City, Anhui Province, China

<sup>#</sup> These authors contributed equally to this work.

## \* Correspondence:

Ting Wang, MD

Email:994340400@qq.com

## Abstract

**Background:** Stroke-associated pneumonia (SAP) is a frequent complication of stroke, characterized by its high incidence rate, and it can have a severe impact on the prognosis of patients. The limitations

20 of current clinical treatment measures underscore the critical need to identify high-risk factors  
21 promptly to decrease the incidence of SAP.

22 **Objective:** To analyze the risk factors of SAP in stroke patients, construct a predictive model of SAP  
23 based on the SHAP interpretable machine learning method, and explain the important variables.

24 **Methods:** A total of 763 stroke patients admitted to the Second Affiliated Hospital of Anhui  
25 University of Traditional Chinese Medicine from July 1, 2023, to May 31, 2024, were selected and  
26 randomly divided into the model training set (n=457) and model validation set (n=306) according to  
27 the ratio of 6:4. Firstly, the included data were sorted out, and then Lasso regression was used to screen  
28 the included characteristic variables. Based on the tidymodels framework, Using decision tree (DT),  
29 logistic regression, extreme gradient boosting (XGBoost), support vector machine (SVM), The  
30 classification model was constructed by five machine learning methods, including SVM and  
31 LightGBM. The grid search and 5-fold cross validation were used to optimize the hyperparameter  
32 optimization strategy and the performance index of the model. The predictive performance of the  
33 model was evaluated by the area under the receiver operating curve (AUC), calibration curve, and  
34 decision curve analysis (DCA), and we used Shapley additive explanation (SHAP) to account for the  
35 model predictions and provide interpretable insights.

36 **Results:** The incidence of SAP in this study was 31.72% (242/763). Six variables were selected by  
37 Lasso regression, including nasogastric tube use, age, ADL score, Alb, Hs-CRP, and Hb. The model

38 with the best performance in the validation set was the XGBoost model, with an AUC of 0.926, an  
39 accuracy of 0.914, and an F1 score of 0.889. Its calibration curve and DCA showed good performance.  
40 SHAP algorithm showed that ADL score ranked first in importance.

41 **Conclusion:** The model constructed using XGBoost has good prediction performance and clinical  
42 applicability, which is expected to support clinical decision-making and improve the prognosis of  
43 patients.

44 **Keywords:** Machine learning; Stroke; Stroke-associated pneumonia; Prediction model; SHAP

45

## 46 **1. Introduction**

47 Stroke is a severe cardiovascular disease that significantly impacts the quality of life and survival  
48 rate of patients. According to the Global Burden of Disease Study, stroke caused approximately 6.55  
49 million deaths in 2019, ranking as the second leading cause of death worldwide, second only to  
50 cardiovascular diseases[1]. In the aftermath of a stroke, patients frequently contend with numerous  
51 complications, with stroke-associated pneumonia (SAP) being among the most prevalent[2]. Surveys  
52 have indicated that the incidence of SAP ranges from 7% to 38%[3–6], SAP not only prolongs  
53 hospitalization and increases economic burdens but can also severely affect patient mortality[4-5].  
54 Currently, the primary treatment for SAP in clinical practice is anti-infective therapy [7]; however,  
55 studies have shown that prophylactic antibiotics do not effectively reduce the risk of SAP

56 occurrence[8]. Therefore, it is crucial for clinicians to promptly identify high-risk individuals for SAP  
57 and implement appropriate preventive measures, which are essential for improving the prognosis of  
58 stroke patients.

59 The establishment of risk prediction models can assist clinicians in identifying high-risk  
60 populations for diseases, allowing for early intervention measures to reduce disease incidence[9]. In  
61 recent years, scholars both domestically and internationally have developed multiple models to predict  
62 the risk of SAP occurrence, presented in the form of scoring systems and scorecards, such as the Kwon  
63 Score[10], A2DS2 Score[11], and AIS-APS Score[12]. These models provide relatively reliable  
64 assessment tools for the prevention and treatment of SAP. However, even well-validated models may  
65 experience performance degradation over time due to changes in disease risk factors, treatment  
66 measures, and treatment contexts. Therefore, models need continuous dynamic updates [13]. In  
67 addition, few studies are using interpretable machine learning to construct SAP risk prediction models.  
68 Based on this, this study considered combining new predictors with known predictors to construct a  
69 model using the machine learning method and using the SHAP algorithm to explain the model, to  
70 improve the accuracy and interpretability of SAP risk prediction.

## 71 **2. Materials and Methods**

### 72 **2.1 Study Design and Subjects**

73 This study is a single-center, retrospective cohort study. We selected stroke patients who were

74 treated at The Second Affiliated Hospital of Anhui University of Chinese Medicine from July 1, 2023,  
75 to May 31, 2024, as the study subjects. Inclusion criteria were: (1) patients diagnosed with stroke; (2)  
76 age  $\geq 18$  years; (3) no mechanical ventilation within 7 days post-stroke. Exclusion criteria were: (1)  
77 discharge, transfer, or death within 24 hours of admission; (2) pre-existing pulmonary infection prior  
78 to admission; (3) abandonment of treatment or voluntary discharge. (4) the missing rate of collected  
79 data exceeded 30%. This study was approved by the Ethics Committee of the Second Affiliated  
80 Hospital of Anhui University of Traditional Chinese Medicine (2023-SXXM43). In addition, informed  
81 consent was omitted for all participants as the study was retrospective in nature, and the research  
82 process was in accordance with the Declaration of Helsinki.

## 83 **2.2 Identification of Candidate Predictive Factors**

84 Candidate predictive factors for this study were identified through literature review and expert  
85 consultation, totaling 27 factors, including: (1) General demographic data: gender, age; (2) Disease-  
86 related factors: activity of daily living (ADL) scale[14] score at admission, type of stroke, location of  
87 stroke, dysphagia, impaired consciousness, hypertension, diabetes mellitus; (3) History of  
88 comorbidities/Personal history: history of stroke, history of underlying pulmonary disease, smoking,  
89 drinking; (4) Disease treatment factors: nasogastric tube, acid suppressants, urinary catheters; (5)  
90 Laboratory test indicators: albumin (Alb), triglyceride (TG), hypersensitive C-reactive protein (Hs-  
91 CRP), white blood cell count (WBC), neutrophil-to-lymphocyte ratio (NLR), monocyte-to-

92 lymphocyte ratio (MLR), hemoglobin (Hb).

### 93 **2.3 Definition and Diagnosis of SAP**

94 According to the consensus published by the SAP Consensus Group composed of  
95 multidisciplinary experts in the UK[2], the outcome indicator SAP is defined as pneumonia that newly  
96 occurs within 7 days in non-mechanically ventilated stroke patients. The diagnosis of SAP follows the  
97 modified standards of the Centers for Disease Control and Prevention (CDC) [15].

### 98 **2.4 Sample Size Estimation**

99 This study utilized the sample size estimation method specifically designed for developing risk  
100 prediction models, as proposed by Riley et al. in 2020[16]. This method takes into account the effects  
101 of multiple categories, interactions, and non-linear relationships, minimizing the risk of model  
102 overfitting while precisely estimating key parameters to determine the appropriate sample size  
103 required to construct the predictive model. The specific calculations were performed using the  
104 "pmsampsize" package in R software. Based on the literature, the average C-statistic of existing  
105 prediction models is approximately 0.827[17], and the incidence of SAP is around 7%-38%[3-6]. This  
106 study anticipated the inclusion of 27 predictive factors, with the calculated required sample size  
107 ranging from 701 to 1272 cases, and an expected number of outcome events ranging from 179 to 253.  
108 The detailed calculation process and results are shown in the supplementary material.

### 109 **2.5 Data Collection and Preprocessing**

110 Data sources were determined by reviewing electronic medical records, including admission  
111 records, discharge summaries, nursing records, and laboratory results, with laboratory parameters  
112 primarily collected from the first admission data. During data collection, we ensured blinding between  
113 the predictive factors and outcome indicators to avoid information bias. To address missing data issues,  
114 the random forest method was used for data imputation to maintain data integrity and the accuracy of  
115 the predictive model (imputation of missing values was performed using the "mice" package in R  
116 software, with five imputations). To prevent information loss, all continuous variables were inputted  
117 using their original values; for categorical variables, categories with low proportions were considered  
118 for merging. After data processing, the dataset was divided into training and validation sets in a 6:4  
119 ratio. The training set data were used to fit the predictive model, while the validation set data were  
120 used to evaluate the model.

## 121 **2.6 Model construction and evaluation**

122 Taking the occurrence of SAP in stroke patients as the dependent variable and alternative  
123 predictors as the independent variable, least absolute shrinkage, and selection operator (Lasso)  
124 regression was used to screen the variables, and then a model was constructed based on the tidymodels  
125 framework. We selected the following five machine learning algorithms to build the model: decision  
126 tree (DT), logistic regression (LR), extreme gradient boosting (XGBoost), support vector machine  
127 (SVM), and light gradient boosting machine (LightGBM). A 5-fold cross-test was performed on the

128 training set as a resampling method, and the hyperparameters were optimized by grid search. We used  
129 the area under the receiver operating characteristic (ROC) curve (AUC) to evaluate the discrimination  
130 of the model and drew calibration curves to evaluate the fit of the model. Decision curve analysis  
131 (DCA) was used to evaluate the clinical practicability of the model. Finally, the accuracy, sensitivity,  
132 specificity, and other indicators of the model were calculated to evaluate the performance of the model.

## 133 **2.7 Interpretability of the model**

134 Shapley additive explanation (SHAP) is a popular method of model explanation, which is based  
135 on the Shapley value in game theory and is used to explain the predictions of any model. The core idea  
136 of SHAP is to decompose the contribution of each feature to the prediction, so that the model  
137 prediction can be expressed as a weighted sum of feature contributions, thereby improving the  
138 transparency and trust of the model and supporting more reasonable decision making. By applying the  
139 SHAP algorithm to the optimal model, we can obtain the importance ranking of features and have an  
140 intuitive understanding of the contribution of these features to the prediction model.

## 141 **2.8 Statistical Methods**

142 Statistical analysis was performed using R 4.3.0 software. Normally distributed continuous data  
143 were expressed as mean  $\pm$  standard deviation (*Mean*  $\pm$  *SD*), and between-group comparisons were  
144 performed using the independent sample t-test. Non-normally distributed continuous data were  
145 expressed as median and interquartile range [*M* (*Q1*, *Q3*)], and between-group comparisons were



146 conducted using the Mann-Whitney U test. Categorical data were expressed as counts and percentages  
147 [ $n$  (%)], and comparisons of unordered categorical data between groups were performed using the  
148 Pearson  $\chi^2$  test or Fisher's exact test. All statistical tests were two-sided, with  $P < 0.05$  considered  
149 statistically significant.

## 150 **3. Results**

### 151 **3.1 Missing Data**

152 There were 7 variables with missing values in this study, including Alb, TG, LDL, HDL, Stroke  
153 location, Hs-CRP, and D-Dimer. The missing values were all imputed by the random forest method  
154 (Fig 1).

#### 155 **Fig 1. Missing data**

### 156 **3.2 Patient Characteristics**

157 Based on the occurrence of SAP, the 763 patients were divided into the non-SAP group ( $n=521$ )  
158 and the SAP group ( $n=242$ ). Among the 763 included patients, there were 504 males (66.06%) and  
159 259 females (33.94%), with an average age of  $67.35 \pm 13.00$  years. The incidence of SAP was 31.72%.  
160 There were statistically significant differences in age, ADL score, type of stroke, dysphagia,  
161 disturbance of consciousness, diabetes, history of lung disease, nasogastric tube therapy, urinary  
162 catheter, Alb, Hs-CRP, WBC, NLR, MLR, Hb, D-Dimer and HDL between the two groups ( $P < 0.05$ ).  
163 The detailed results are presented in Table 1.

164

**Table 1 Comparison between non-SAP and SAP groups**

| Variable                                  | All (n=763)          | SAP (n=242)          | non-SAP (n=521)      | P-value |
|-------------------------------------------|----------------------|----------------------|----------------------|---------|
| Sex, n (%)                                |                      |                      |                      | 0.761   |
| Male                                      | 504 (66.06)          | 158 (65.29)          | 346 (66.41)          |         |
| Female                                    | 259 (33.94)          | 84 (34.71)           | 175 (33.59)          |         |
| Age, Mean±SD                              | 67.35±13.00          | 72.08±11.84          | 65.15±12.94          | <0.001  |
| ADL, M (Q <sub>1</sub> , Q <sub>3</sub> ) | 55.00 (29.00, 79.50) | 20.00 (10.00, 40.00) | 65.00 (50.00, 85.00) | <0.001  |
| Type of stroke, n (%)                     |                      |                      |                      | <0.001  |
| Ischemic stroke                           | 595 (77.98)          | 159 (65.70)          | 436 (83.69)          |         |
| Hemorrhagic stroke                        | 124 (16.25)          | 60 (24.79)           | 64 (12.28)           |         |
| Both                                      | 44 (5.77)            | 23 (9.50)            | 21 (4.03)            |         |
| Stroke location, n (%)                    |                      |                      |                      | 0.635   |
| Left                                      | 223 (29.23)          | 74 (30.58)           | 149 (28.60)          |         |
| Right                                     | 184 (24.12)          | 48 (19.83)           | 136 (26.10)          |         |
| Multiple                                  | 356 (46.66)          | 120 (49.59)          | 236 (45.30)          |         |
| Dysphagia, n (%)                          |                      |                      |                      | <0.001  |
| No                                        | 525 (68.81)          | 106 (43.80)          | 419 (80.42)          |         |
| Yes                                       | 238 (31.19)          | 136 (56.20)          | 102 (19.58)          |         |
| Disorders of                              |                      |                      |                      | <0.001  |
| No                                        | 708 (92.79)          | 192 (79.34)          | 516 (99.04)          |         |
| Yes                                       | 55 (7.21)            | 50 (20.66)           | 5 (0.96)             |         |

|                                 |             |             |             |        |
|---------------------------------|-------------|-------------|-------------|--------|
| Hypertension, <i>n</i> (%)      |             |             |             | 0.955  |
| No                              | 141 (18.48) | 45 (18.60)  | 96 (18.43)  |        |
| Yes                             | 622 (81.52) | 197 (81.40) | 425 (81.57) |        |
| Diabetes mellitus, <i>n</i> (%) |             |             |             | 0.037  |
| No                              | 460 (60.29) | 159 (65.70) | 301 (57.77) |        |
| Yes                             | 303 (39.71) | 83 (34.30)  | 220 (42.23) |        |
| History of stroke, <i>n</i> (%) |             |             |             | 0.061  |
| No                              | 413 (54.13) | 119 (49.17) | 294 (56.43) |        |
| Yes                             | 350 (45.87) | 123 (50.83) | 227 (43.57) |        |
| Smoking, <i>n</i> (%)           |             |             |             | 0.244  |
| No                              | 703 (92.14) | 227 (93.80) | 476 (91.36) |        |
| Yes                             | 60 (7.86)   | 15 (6.20)   | 45 (8.64)   |        |
| Drinking, <i>n</i> (%)          |             |             |             | 0.462  |
| No                              | 708 (92.79) | 227 (93.80) | 481 (92.32) |        |
| Yes                             | 55 (7.21)   | 15 (6.20)   | 40 (7.68)   |        |
| History of lung disease,        |             |             |             | <0.001 |
| No                              | 733 (96.07) | 223 (92.15) | 510 (97.89) |        |
| Yes                             | 30 (3.93)   | 19 (7.85)   | 11 (2.11)   |        |
| Nasogastric tube                |             |             |             | <0.001 |
| No                              | 602 (78.90) | 96 (39.67)  | 506 (97.12) |        |
| Yes                             | 161 (21.10) | 146 (60.33) | 15 (2.88)   |        |

|                                               |                         |                         |                         |        |
|-----------------------------------------------|-------------------------|-------------------------|-------------------------|--------|
| Urinary catheter, <i>n</i> (%)                |                         |                         |                         | <0.001 |
| No                                            | 664 (87.02)             | 162 (66.94)             | 502 (96.35)             |        |
| Yes                                           | 99 (12.98)              | 80 (33.06)              | 19 (3.65)               |        |
| Acid suppressant, <i>n</i> (%)                |                         |                         |                         | 0.115  |
| No                                            | 561 (73.53)             | 169 (69.83)             | 392 (75.24)             |        |
| Yes                                           | 202 (26.47)             | 73 (30.17)              | 129 (24.76)             |        |
| Alb, Mean±SD                                  | 38.69±4.05              | 36.39±4.24              | 39.76±3.47              | <0.001 |
| TG, M (Q <sub>1</sub> , Q <sub>3</sub> )      | 1.28 (0.95, 1.69)       | 1.27 (0.90, 1.64)       | 1.28 (0.97, 1.73)       | 0.103  |
| Hs-CRP, M (Q <sub>1</sub> , Q <sub>3</sub> )  | 2.86 (1.04, 10.07)      | 9.45 (3.38, 19.40)      | 1.72 (0.83, 4.08)       | <0.001 |
| WBC, M (Q <sub>1</sub> , Q <sub>3</sub> )     | 6.38 (5.16, 7.78)       | 6.75 (5.28, 9.39)       | 6.24 (5.10, 7.38)       | <0.001 |
| NLR, M (Q <sub>1</sub> , Q <sub>3</sub> )     | 2.38 (1.69, 3.38)       | 2.87 (1.95, 4.71)       | 2.20 (1.60, 2.98)       | <0.001 |
| MLR, M (Q <sub>1</sub> , Q <sub>3</sub> )     | 0.32 (0.24, 0.45)       | 0.42 (0.27, 0.59)       | 0.30 (0.23, 0.40)       | <0.001 |
| Hb, Mean±SD                                   | 124.74±17.70            | 116.09±18.88            | 128.76±15.59            | <0.001 |
| PLT, M (Q <sub>1</sub> , Q <sub>3</sub> )     | 208.00 (171.50, 255.00) | 214.50 (171.50, 278.75) | 204.00 (172.00, 247.00) | 0.086  |
| D-Dimer, M (Q <sub>1</sub> , Q <sub>3</sub> ) | 0.57 (0.28, 1.39)       | 1.14 (0.67, 2.33)       | 0.38 (0.23, 0.82)       | <0.001 |
| HDL, M (Q <sub>1</sub> , Q <sub>3</sub> )     | 0.93 (0.78, 1.11)       | 0.89 (0.75, 1.07)       | 0.94 (0.79, 1.13)       | 0.006  |
| LDL, M (Q <sub>1</sub> , Q <sub>3</sub> )     | 2.14 (1.72, 2.71)       | 2.22 (1.75, 2.81)       | 2.12 (1.71, 2.63)       | 0.109  |

### 165 **3.3 Correlation Analysis of Variables and Variable Selection**

166 To explore the relationship between variables, Spearman's rank correlation coefficient was used

167 to assess the linear relationship between variables (Fig 2). We performed the Lasso regression method

168 to screen the 27 included variables. The optimal  $\lambda$  value corresponding to one standard error of the

169 minimum mean square error was determined through 10-fold cross-validation. The results indicated  
170 that when  $\log(\lambda)$  reached one standard error of the minimum mean square error, the number of model  
171 variables was reduced to 6, with the optimal  $\lambda$  value determined to be 0.039 through cross-validation.  
172 The final variables included Nasogastric tube therapy, Age, ADL, Alb, Hs-CRP, Hb. The procedure  
173 for selecting variables by Lasso regression is shown in Fig 3A and Fig 3B.

174 **Fig 2. Correlation between variables**

175 **Fig 3. Lasso regression procedure for screening variables. (A) Deviation at different values of**  
176 **lambda. (B) Plot of lambda versus partial regression coefficients.**

### 177 **3.4 Model construction and evaluation**

178 Five machine learning models were constructed using the six identified variables. In the training  
179 set, 5-fold cross-validation was employed as a method for data resampling to ensure the model's  
180 performance on unseen data. Additionally, grid search was utilized to optimize the key  
181 hyperparameters, which included the number of features, the number of trees, the minimum number  
182 of samples, the maximum depth of trees, and the learning rate. The validation set was utilized to assess  
183 the model's performance. The ROC curves for the five machine learning models in the validation set  
184 revealed that the XGBoost model achieved the highest AUC value of 0.926 (Fig. 4). The calibration  
185 curves for each model indicated that the average predicted probability aligned with the actual  
186 occurrence probability for all models except for the decision tree (DT) and support vector machine

187 (SVM) models (Fig. 5). Decision curve analysis (DCA) demonstrated that all models maintained good  
188 net benefits within a certain threshold probability, indicating high clinical utility value (Fig. 6). The  
189 XGBoost model also demonstrated superior predictive performance and practical utility in both the  
190 calibration curve and DCA. A comparison of the performance indicators for the five machine learning  
191 models in the validation set showed that the XGBoost model continued to excel, with an AUC of  
192 0.926, an accuracy of 0.914, and an F1 score of 0.889. Additional model indicators are presented in  
193 Table 2.

194 **Fig 4. ROC curves of the five machine learning models**

195 **Fig 5. Calibration curves of five machine learning models**

196 **Fig 6. DCA for five machine learning models**

197 **Table 2 Comparison of predictive performance metrics for various models in the validation set**

|             | DT    | LR    | XGBoost | SVM   | LightGBM |
|-------------|-------|-------|---------|-------|----------|
| Accuracy    | 0.817 | 0.833 | 0.853   | 0.781 | 0.840    |
| Kappa       | 0.584 | 0.614 | 0.670   | 0.529 | 0.635    |
| Sensitivity | 0.852 | 0.880 | 0.866   | 0.775 | 0.871    |
| Specificity | 0.742 | 0.732 | 0.825   | 0.794 | 0.773    |
| PPV         | 0.877 | 0.876 | 0.914   | 0.890 | 0.892    |
| NPV         | 0.699 | 0.740 | 0.741   | 0.621 | 0.735    |
| MCC         | 0.585 | 0.614 | 0.673   | 0.539 | 0.636    |

|                      |       |       |       |       |       |
|----------------------|-------|-------|-------|-------|-------|
| J-index              | 0.594 | 0.612 | 0.691 | 0.569 | 0.644 |
| Balanced Accuracy    | 0.797 | 0.806 | 0.845 | 0.784 | 0.822 |
| Detection Prevalence | 0.663 | 0.686 | 0.647 | 0.595 | 0.667 |
| Precision            | 0.877 | 0.876 | 0.914 | 0.890 | 0.892 |
| Recall               | 0.852 | 0.880 | 0.866 | 0.775 | 0.871 |
| F-measure            | 0.864 | 0.878 | 0.889 | 0.829 | 0.881 |
| AUC                  | 0.834 | 0.911 | 0.926 | 0.898 | 0.913 |

198 PPV, positive predictive value; NPV, negative predictive value; MCC, matthews correlation  
199 coefficient

### 200 **3.5 Interpreting the XGBoost model using SHAP**

201 The importance ranking plot of the variables showed that ADL had the highest mean SHAP value  
202 and the strongest predictive performance (Fig 7). To analyze the positive and negative correlation  
203 between the variable and the target outcome, we drew a beeswarm in which the color depth reflected  
204 the value of the variable. Taking the first behavior as an example, the low ADL level had a negative  
205 effect on the outcome prediction. High ADL level was a positive predictor of outcome (Fig 8). Finally,  
206 the SHAP value is used to show the influence of different variables in a sample on the prediction result  
207 of SAP occurrence risk. The value in the Fig represents the contribution degree of each feature to the  
208 output result of the model. A positive number indicates that when the feature increases, the predictive  
209 value of the model will also increase. The opposite is true for negative numbers (Fig 9).

210 **Fig 7. The importance ranking of variables was analyzed based on SHAP algorithm**

211 **Fig 8. The beeswarm of the XGBoost model was analyzed based on SHAP algorithm**

212 **Fig 9. The risk of SAP in a single sample was analyzed based on SHAP algorithm**

## 213 **4. Discussion**

214 In this study, five machine learning methods were used to construct a risk prediction model for  
215 SAP in stroke patients based on six predictors, including Nasogastric tube therapy, Age, ADL, Alb,  
216 Hs-CRP, Hb. Among them, the XGBoost model validation set showed good discrimination and  
217 calibration. The prediction performance of the models was better than those of previous studies [10–  
218 12]. Additionally, the model was visualized using a nomogram, making the risk scoring more intuitive  
219 and quantifiable.

220 SHAP algorithm results showed that the lower the ADL score, the higher the risk of SAP. It was  
221 found that patients with SAP tended to have longer hospital stays and lower ADL scores compared  
222 with non-SAP patients[18]. A low ADL score typically indicates a limited ability to perform self-care,  
223 potentially leading to prolonged bed rest, which indirectly increases the risk of pulmonary  
224 infections[19]. Furthermore, low ADL scores may correlate with poor nutritional status,  
225 compromising the immune system and making patients more prone to infections. Early rehabilitation  
226 exercises can enhance the self-care abilities of stroke patients, reducing the risk of lung infections, and  
227 clinical practitioners should promptly intervene in patients with limited mobility.



228           In this study, indwelling nasogastric tube was a risk factor for SAP in stroke patients. This result  
229   is consistent with reports in the existing study[20].Brogan found that nasogastric tubes were a stronger  
230   predictor of SAP than dysphagia[21]. Research indicates that during nasogastric tube feeding, the  
231   gastric volume significantly expands, potentially causing gastric muscle spasms and food  
232   accumulation. In the mean time, patients with nasogastric tubes face increased risks of elevated  
233   intracranial pressure, vomiting, and food reflux, collectively heightening the probability of SAP[22].  
234   However, a study on acute stroke patients found that placing a nasogastric tube within 48 hours of  
235   onset did not increase the incidence of SAP, mortality, or adverse functional outcomes[23],  
236   contradicting our findings. Thus, the relationship between the duration of nasogastric tube indwelling  
237   and SAP remains to be studied.

238           This finding suggests that older stroke patients are more susceptible to SAP, consistent with  
239   previous studies[11,12]. As individuals age, their physiological functions and immune system  
240   capabilities deteriorate, weakening respiratory defenses. Additionally, older stroke patients often  
241   exhibit diminished swallowing and coughing reflexes, making them more vulnerable to pulmonary  
242   infections post-stroke[24].

243           Among the laboratory examination indicators, high Hs-CRP level was a factor affecting the  
244   occurrence of SAP, which was consistent with the results of previous studies[25]. Hs-CRP represents  
245   an acute phase reactive protein produced by the liver, falling under the category of C-reactive protein

246 (CRP). Hs-CRP demonstrates superior sensitivity and early discriminative capabilities, making it  
247 detectable with high efficiency during the initial phases of inflammation or at minimal  
248 concentrations[26]. Research indicates that alterations in serum Hs-CRP levels among patients  
249 following cerebral infarction are strongly correlated with the occurrence of secondary pulmonary  
250 infections. As Hs-CRP levels rise, the inflammatory response becomes more pronounced[27]. Another  
251 effective predictor of SAP is Hb, and the decrease in Hb level usually means the patient is at risk of  
252 anemia, which can significantly increase the mortality and the risk of pneumonia[28]. Anemia is  
253 associated with compromised immune system function, thereby compromising the patient's immune  
254 response and rendering stroke patients more vulnerable to bacterial or viral pathogens[29]. Several  
255 prior studies have established that stroke patients with reduced serum Alb levels are at an elevated risk  
256 of contracting infections or pneumonia while hospitalized[30–32], one possible reason is that Alb has  
257 anti-inflammatory, anti-oxidative, anticoagulant effects as well as regulation of microvascular  
258 permeability; therefore, low Alb level is a marker of systemic inflammatory response[32].  
259 Furthermore, reduced levels of Alb can precipitate malnutrition in patients, which in turn diminishes  
260 the patient's overall health and impairs their resistance to infection, consequently elevating the risk of  
261 pneumonia[33].

262 Machine learning algorithms demonstrate substantial superiority over traditional regression  
263 techniques in handling high-dimensional data, intricate relationships, and feature selection, while also

264 enhancing prediction accuracy. In this study, XGBoost exhibited robust predictive capabilities,  
265 currently standing as one of the most widely used machine learning algorithms. It offers high accuracy,  
266 incorporates regularization, and boasts both high prediction performance and interpretability, hence  
267 holding great promise for application in risk prediction and various other domains[34–36]. In order to  
268 achieve the best accuracy on large modern datasets, it is often necessary to rely on complex models.  
269 However, complex models are often difficult to balance the contradiction between model accuracy  
270 and interpretability. Based on this, the SHAP framework provides a powerful tool for model  
271 interpretation that can help us balance model accuracy and interpretability and make better use of  
272 complex models in practical applications[37].

## 273 **5. Limitations**

274 Despite the robust performance of our model in various aspects, there are limitations. First, this  
275 study is a single-center, retrospective study, with data collection primarily relying on nursing and  
276 physician records, which may result in limited data and potential information bias. Secondly, our  
277 model has not yet undergone external validation in other populations, so its generalizability remains  
278 to be further examined. Additionally, the model depends on accurate data input, and data integrity in  
279 practical applications could affect the predictive performance. Future research should aim to optimize  
280 the model further, incorporating more potential predictive factors and exploring advanced machine  
281 learning algorithms.

## 282 **6. Conclusion**

283       The models developed in this study demonstrate strong predictive capabilities and clinical utility  
284 in assessing the risk of stroke-associated pneumonia in stroke patients, with the XGBoost model  
285 achieving the highest performance. Furthermore, the SHAP framework has been instrumental in  
286 elucidating the models, identifying the critical factors influencing the onset of stroke-associated  
287 pneumonia, and has furnished crucial insights for clinical decision-making. Our findings provide a  
288 new tool for SAP prediction, which may support clinical decision-making and improve patient  
289 outcomes.

290

## 291 **Conflict of Interest**

292       The authors declare that the research was conducted in the absence of any commercial or financial  
293 relationships that could be construed as a potential conflict of interest.

294

## 295 **Author Contributions**

296       Chunbiao Li: Writing – original draft, Writing – review & editing, Conceptualization, Software;

297       Formal Analysis, Visualization

298       Ting Wang: Writing – review & editing, Conceptualization, Methodology, Funding acquisition;

299       Juan Yuan: Writing – review & editing, Conceptualization, Methodology; Supervision;

300 Linli Yuan: Writing – review & editing, Funding acquisition, Data curation

301 Min You: Writing – review & editing, Supervision, Funding acquisition, Data curation.

302

## 303 **Acknowledgments**

304 The authors are very grateful to the authority of the Second Affiliated Hospital of Anhui University  
305 of Traditional Chinese Medicine for allowing us to use these data for the construction of the model.

306 The authors would like to thank Dajin Li and Yi Liu for their valuable help.

307

## 308 **Funding Information**

309 This study were supported by Anhui Provincial University Research Project (2023AH050784), Anhui  
310 Provincial Research Preparation Programme Project (2022AH050463) and Anhui Provincial  
311 University Scientific Research Project (2023AH050857)

312

## 313 **Supporting information**

314 S1 Fig. Graphical representation of cross validation of the optimal hyperparameters of the XGBoost  
315 model

316 S2 Fig. Confusion matrix of the XGBoost model in the training and validation sets

317 S3 Fig. Importance ranking of variables in the XGBoost model

318 S4 Fig. Performance of five machine learning models in the validation set

319 S5 Fig. Comparison of five machine learning models with five-fold cross-validation (AUC as  
320 evaluation index)

321 S6 Fig. Dependence plot of ADL

322 S7 Fig. Dependence plot of Hs-CRP

323 S8 Fig. Dependence plot of Age

324 S9 Fig. Dependence plot of Nasogastric tube therapy

325 S10 Fig. Dependence plot of Alb

326 S11 Fig. Dependence plot of Hb

327

## 328 **References**

- 329 1. Feigin VL, Stark BA, Johnson CO, Roth GA, Bisignano C, Abady GG, et al. Global, regional,  
330 and national burden of stroke and its risk factors, 1990–2019: a systematic analysis for the  
331 Global Burden of Disease Study 2019. *Lancet Neurol.* 2021;20: 795–820. doi:10.1016/S1474-  
332 4422(21)00252-0
- 333 2. Smith CJ, Kishore AK, Vail A, Chamorro A, Garau J, Hopkins SJ, et al. Diagnosis of Stroke-  
334 Associated Pneumonia: Recommendations from the Pneumonia in Stroke Consensus Group.  
335 *Stroke.* 2015;46: 2335–2340. doi:10.1161/STROKEAHA.115.009617

- 336 3. Ji R, Wang D, Shen H, Pan Y, Liu G, Wang P, et al. Interrelationship among common medical  
337 complications after acute stroke: pneumonia plays an important role. *Stroke*. 2013;44: 3436–  
338 3444. doi:10.1161/STROKEAHA.113.001931
- 339 4. Smith CJ, Bray BD, Hoffman A, Meisel A, Heuschmann PU, Wolfe CDA, et al. Can a Novel  
340 Clinical Risk Score Improve Pneumonia Prediction in Acute Stroke Care? A UK Multicenter  
341 Cohort Study. *J Am Heart Assoc*. 2015;4: e001307. doi:10.1161/JAHA.114.001307
- 342 5. Teh WH, Smith CJ, Barlas RS, Wood AD, Bettencourt-Silva JH, Clark AB, et al. Impact of  
343 stroke-associated pneumonia on mortality, length of hospitalization, and functional outcome.  
344 *Acta Neurol Scand*. 2018;138: 293–300. doi:10.1111/ane.12956
- 345 6. Yu Y-J, Weng W-C, Su F-C, Peng T-I, Chien Y-Y, Wu C-L, et al. Association between  
346 pneumonia in acute stroke stage and 3-year mortality in patients with acute first-ever ischemic  
347 stroke. *J Clin Neurosci*. 2016;33: 124–128. doi:10.1016/j.jocn.2016.02.039
- 348 7. Houck PM, Bratzler DW, Nsa W, Ma A, Bartlett JG. Timing of antibiotic administration and  
349 outcomes for Medicare patients hospitalized with community-acquired pneumonia. *Arch Intern*  
350 *Med*. 2004;164: 637–644. doi:10.1001/archinte.164.6.637
- 351 8. Vermeij J-D, Westendorp WF, Dippel DW, van de Beek D, Nederkoorn PJ. Antibiotic therapy  
352 for preventing infections in people with acute stroke. *Cochrane Database Syst Rev*. 2018;1:  
353 CD008530. doi:10.1002/14651858.CD008530.pub3

- 354 9. Ranstam J, Cook JA, Collins GS. Clinical prediction models. *Br J Surg*. 2016;103: 1886.  
355 doi:10.1002/bjs.10242
- 356 10. Kwon H-M, Jeong S-W, Lee S-H, Yoon B-W. The pneumonia score: A simple grading scale  
357 for prediction of pneumonia after acute stroke. *Am J Infect Control*. 2006;34: 64–68.  
358 doi:10.1016/j.ajic.2005.06.011
- 359 11. Hoffmann S, Malzahn U, Harms H, Koennecke H-C, Berger K, Kalic M, et al. Development of  
360 a Clinical Score (A2DS2) to Predict Pneumonia in Acute Ischemic Stroke. *Stroke*. 2012;43:  
361 2617–2623. doi:10.1161/STROKEAHA.112.653055
- 362 12. Ji R, Shen H, Pan Y, Wang P, Liu G, Wang Y, et al. Novel Risk Score to Predict Pneumonia  
363 After Acute Ischemic Stroke. *Stroke*. 2013;44: 1303–1309.  
364 doi:10.1161/STROKEAHA.111.000598
- 365 13. Gu H, Zhou Z, Zhang Z, Zhou Q. Clinical Prediction Models: Basic Concepts, Application  
366 Scenarios, and Research Strategies. *Chin J Evid Based Cardiovasc Med*. 2018;10: 1454-  
367 1456+1462.
- 368 14. Collin C, Wade DT, Davies S, Horne V. The Barthel ADL Index: A reliability study. *Int Disabil*  
369 *Stud*. 1988;10: 61–63. doi:10.3109/09638288809164103
- 370 15. Horan TC, Andrus M, Dudeck MA. CDC/NHSN surveillance definition of health care-  
371 associated infection and criteria for specific types of infections in the acute care setting. *Am J*



- 372 Infect Control. 2008;36: 309–332. doi:10.1016/j.ajic.2008.03.002
- 373 16. Riley RD, Ensor J, Snell KIE, Harrell FE, Martin GP, Reitsma JB, et al. Calculating the sample  
374 size required for developing a clinical prediction model. *BMJ*. 2020; m441.  
375 doi:10.1136/bmj.m441
- 376 17. CAO Y, ZENG X, ZHAO X, PENG M. Risk prediction models for stroke-associated pneumonia:  
377 a systematic review. *Chin J Evid-Based Med*. 2023;23: 1259–1268.
- 378 18. Maeshima S, Osawa A, Hayashi T, Tanahashi N. Elderly Age, Bilateral Lesions, and Severe  
379 Neurological Deficit Are Correlated with Stroke-associated Pneumonia. *J Stroke Cerebrovasc*  
380 *Dis*. 2014;23: 484–489. doi:10.1016/j.jstrokecerebrovasdis.2013.04.004
- 381 19. Matsusaka K, Kawakami G, Kamekawa H, Momma H, Nagatomi R, Itoh J, et al. Pneumonia  
382 risks in bedridden patients receiving oral care and their screening tool: Malnutrition and urinary  
383 tract infection-induced inflammation. *Geriatr Gerontol Int*. 2018;18: 714–722.  
384 doi:10.1111/ggi.13236
- 385 20. Schwarz M, Coccetti A, Murdoch A, Cardell E. The impact of aspiration pneumonia and  
386 nasogastric feeding on clinical outcomes in stroke patients: A retrospective cohort study. *J Clin*  
387 *Nurs*. 2018;27. doi:10.1111/jocn.13922
- 388 21. Brogan E, Langdon C, Brookes K, Budgeon C, Blacker D. Respiratory infections in acute stroke:  
389 nasogastric tubes and immobility are stronger predictors than dysphagia. *Dysphagia*. 2014;29:

- 390 340–345. doi:10.1007/s00455-013-9514-5
- 391 22. Wang Q, Liu Y, Han L, He F, Cai N, Zhang Q, et al. Risk factors for acute stroke-associated  
392 pneumonia and prediction of neutrophil-to-lymphocyte ratios. *Am J Emerg Med.* 2021;41: 55–  
393 59. doi:10.1016/j.ajem.2020.12.036
- 394 23. Kalra L, Hodsoll J, Irshad S, Smithard D, Manawadu D, STROKE-INF Investigators.  
395 Association between nasogastric tubes, pneumonia, and clinical outcomes in acute stroke  
396 patients. *Neurology.* 2016;87: 1352–1359. doi:10.1212/WNL.0000000000003151
- 397 24. Patel UK, Kodumuri N, Dave M, Lekshminarayanan A, Khan N, Kavi T, et al. Stroke-  
398 Associated Pneumonia: A Retrospective Study of Risk Factors and Outcomes. *The Neurologist.*  
399 2020;25: 39–48. doi:10.1097/NRL.0000000000000269
- 400 25. Huang L, Zhang R, Ji J, Long F, Wang Y, Lu J, et al. Hypersensitive C-reactive protein-albumin  
401 ratio is associated with stroke-associated pneumonia and early clinical outcomes in patients with  
402 acute ischemic stroke. *Brain Behav.* 2022;12: e2675. doi:10.1002/brb3.2675
- 403 26. Banait T, Wanjari A, Danade V, Banait S, Jain J. Role of High-Sensitivity C-reactive Protein  
404 (Hs-CRP) in Non-communicable Diseases: A Review. *Cureus.* 2022;14: e30225.  
405 doi:10.7759/cureus.30225
- 406 27. Wang L, Wu L, Lang Y, Wu D, Chen J, Zhao W, et al. Association between high-sensitivity C-  
407 reactive protein levels and clinical outcomes in acute ischemic stroke patients treated with

- 408           endovascular therapy. *Ann Transl Med.* 2020;8: 1379. doi:10.21037/atm-20-3820
- 409   28.   Wei C -C., Zhang S -T., Tan G, Zhang S -H., Liu M. Impact of anemia on in-hospital  
410           complications after ischemic stroke. *Eur J Neurol.* 2018;25: 768–774. doi:10.1111/ene.13595
- 411   29.   Song X, He Y, Bai J, Zhang J. A nomogram based on nutritional status and A2DS2 score for  
412           predicting stroke-associated pneumonia in acute ischemic stroke patients with type 2 diabetes  
413           mellitus: A retrospective study. *Front Nutr.* 2022;9: 1009041. doi:10.3389/fnut.2022.1009041
- 414   30.   Yang X, Wang L, Zheng L, Wu J, Liu J, Hao Z, et al. Serum Albumin as a Potential Predictor  
415           of Pneumonia after an Acute Ischemic Stroke. *Curr Neurovasc Res.* 2020;17: 385–393.  
416           doi:10.2174/1567202617666200514120641
- 417   31.   Huang L, Zhang R, Ji J, Long F, Wang Y, Lu J, et al. Hypersensitive C-reactive protein-albumin  
418           ratio is associated with stroke-associated pneumonia and early clinical outcomes in patients with  
419           acute ischemic stroke. *Brain Behav.* 2022;12: e2675. doi:10.1002/brb3.2675
- 420   32.   Lin G, Hu M, Song J, Xu X, Liu H, Qiu L, et al. High Fibrinogen to Albumin Ratio: A Novel  
421           Marker for Risk of Stroke-Associated Pneumonia? *Front Neurol.* 2022;12: 747118.  
422           doi:10.3389/fneur.2021.747118
- 423   33.   Chen L, Xu M, Huang Q, Liu Y, Ren W. Clinical significance of albumin to globulin ratio  
424           among patients with stroke-associated pneumonia. *Front Nutr.* 2022;9: 970573.  
425           doi:10.3389/fnut.2022.970573

- 426 34. Zhang Y, Xiang T, Wang Y, Shu T, Yin C, Li H, et al. Explainable machine learning for  
427 predicting 30-day readmission in acute heart failure patients. *iScience*. 2024;27: 110281.  
428 doi:10.1016/j.isci.2024.110281
- 429 35. Islam MM, Rahman MJ, Rabby MS, Alam MJ, Pollob SMAI, Ahmed NAMEF, et al. Predicting  
430 the risk of diabetic retinopathy using explainable machine learning algorithms. *Diabetes Metab*  
431 *Syndr*. 2023;17: 102919. doi:10.1016/j.dsx.2023.102919
- 432 36. Hou N, Li M, He L, Xie B, Wang L, Zhang R, et al. Predicting 30-days mortality for MIMIC-  
433 III patients with sepsis-3: a machine learning approach using XGboost. *J Transl Med*. 2020;18:  
434 1–14. doi:10.1186/s12967-020-02620-5
- 435 37. Lundberg SM, Lee S-I. A unified approach to interpreting model predictions. *Proceedings of*  
436 *the 31st International Conference on Neural Information Processing Systems*. Red Hook, NY,  
437 USA: Curran Associates Inc.; 2017. pp. 4768–4777.
- 438

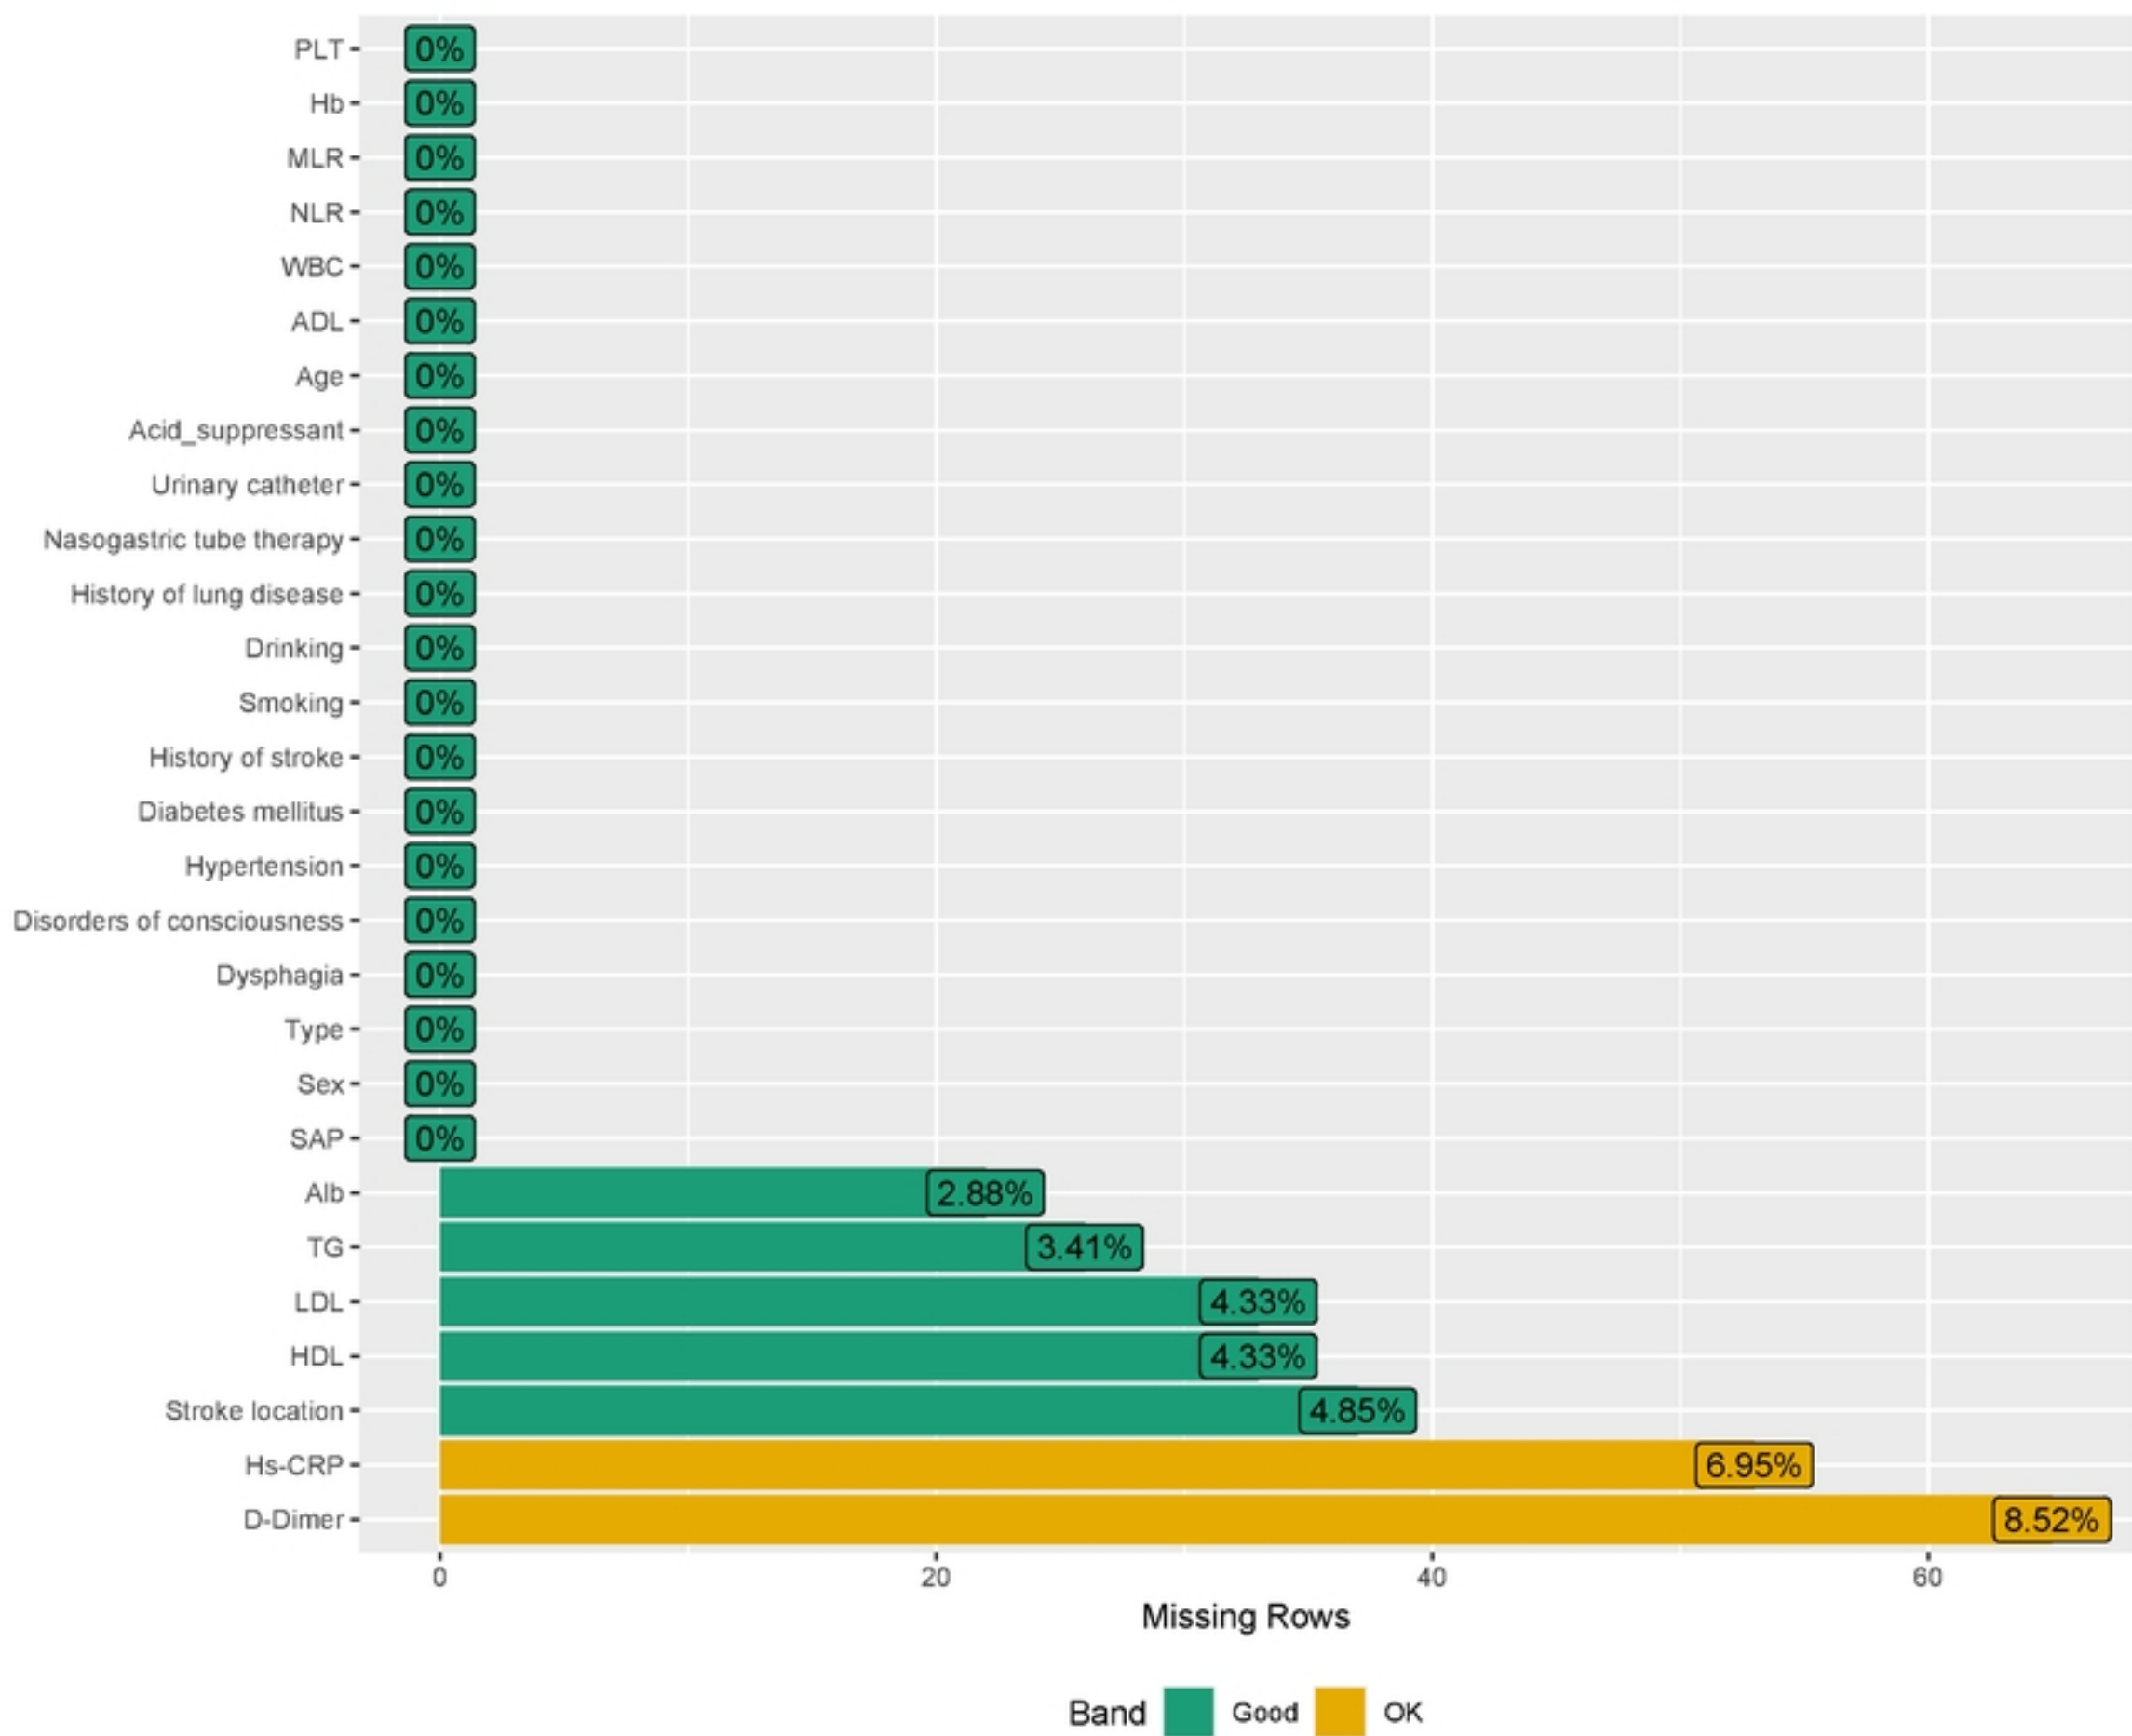

Fig1

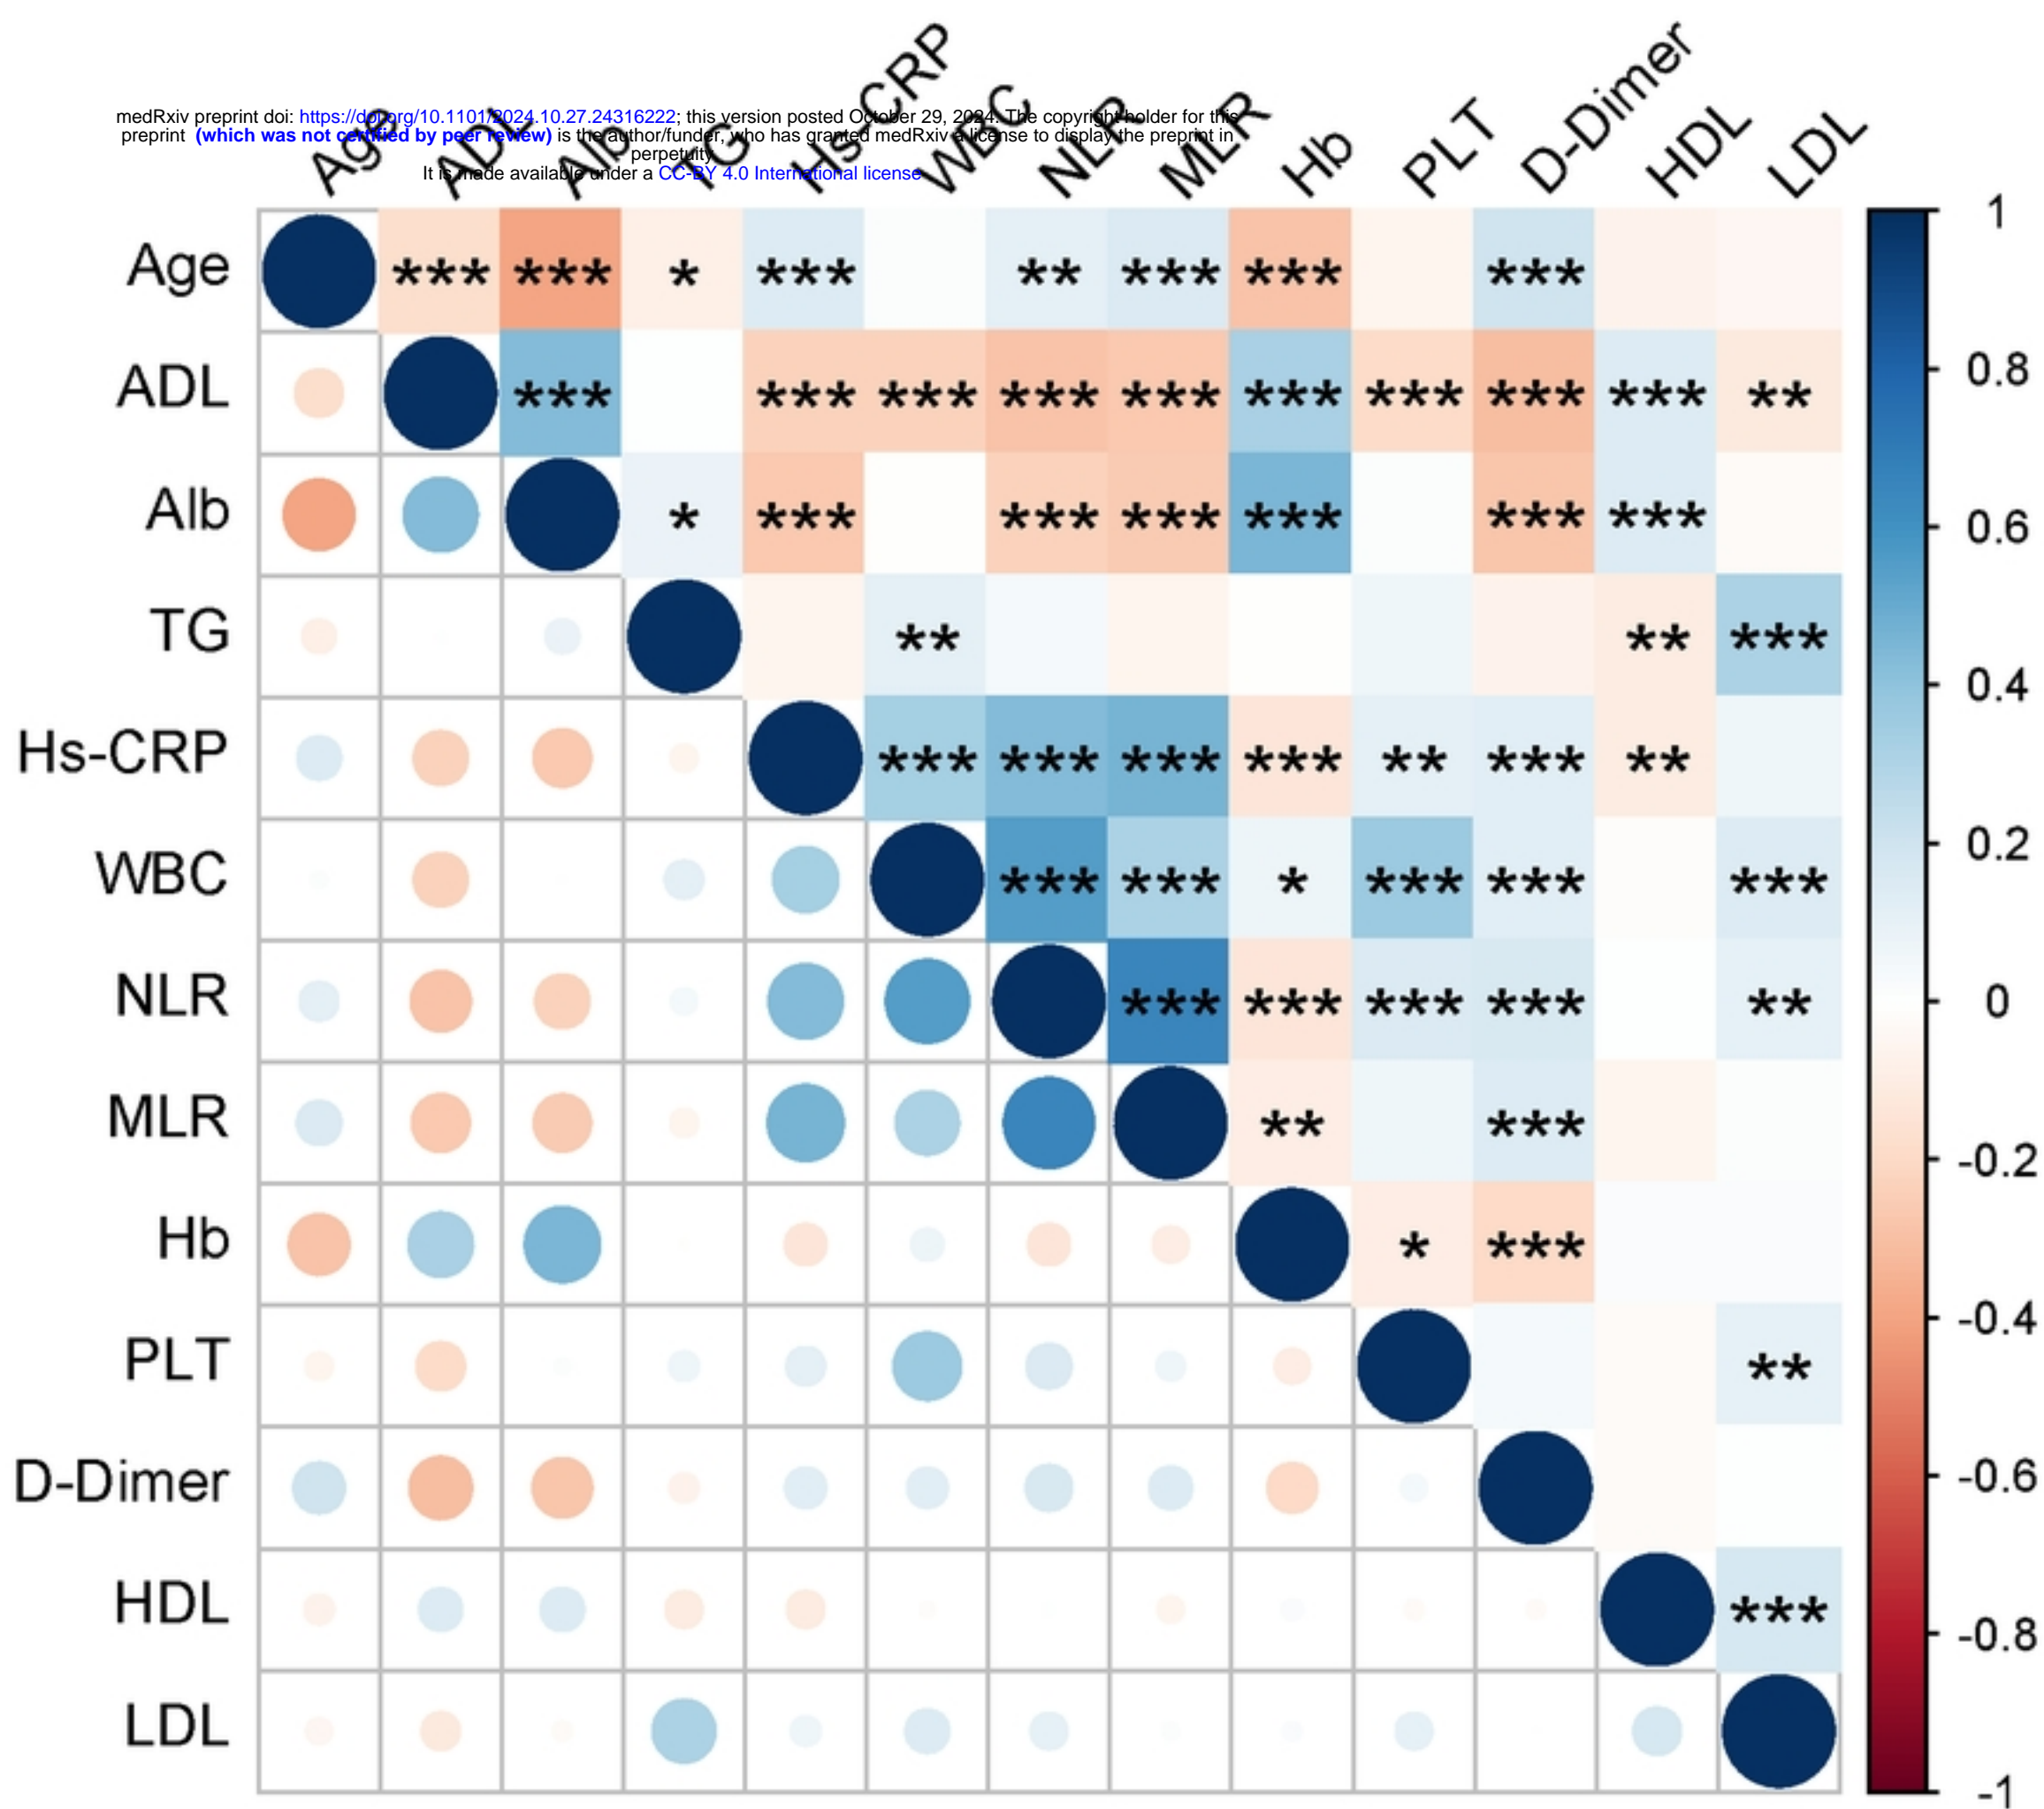

Fig2

25 25 25 25 25 24 24 21 20 19 17 13 9 7 6 5 2 2 2 2 2

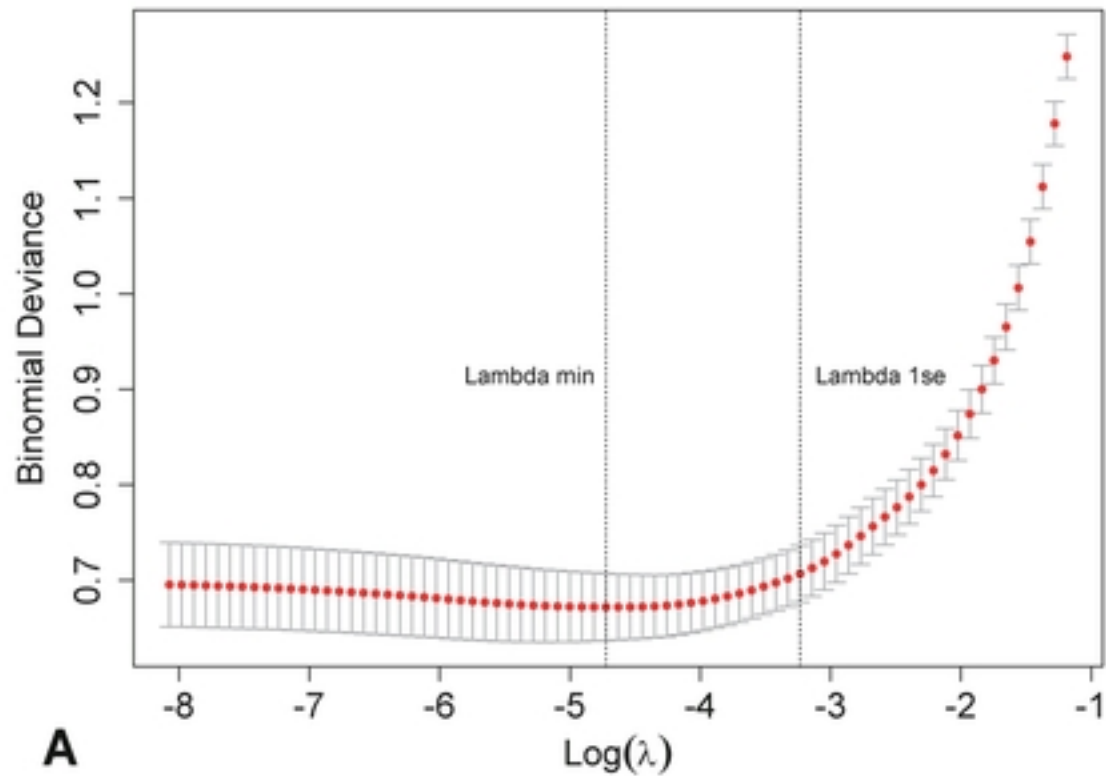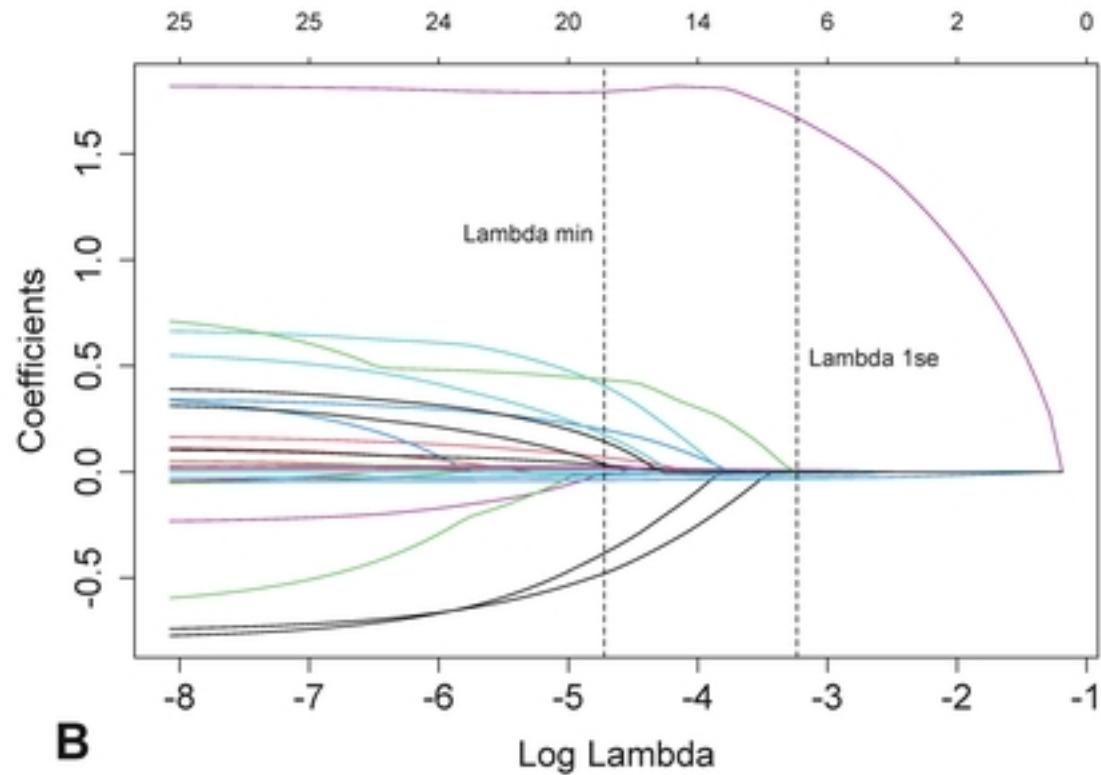

Fig3

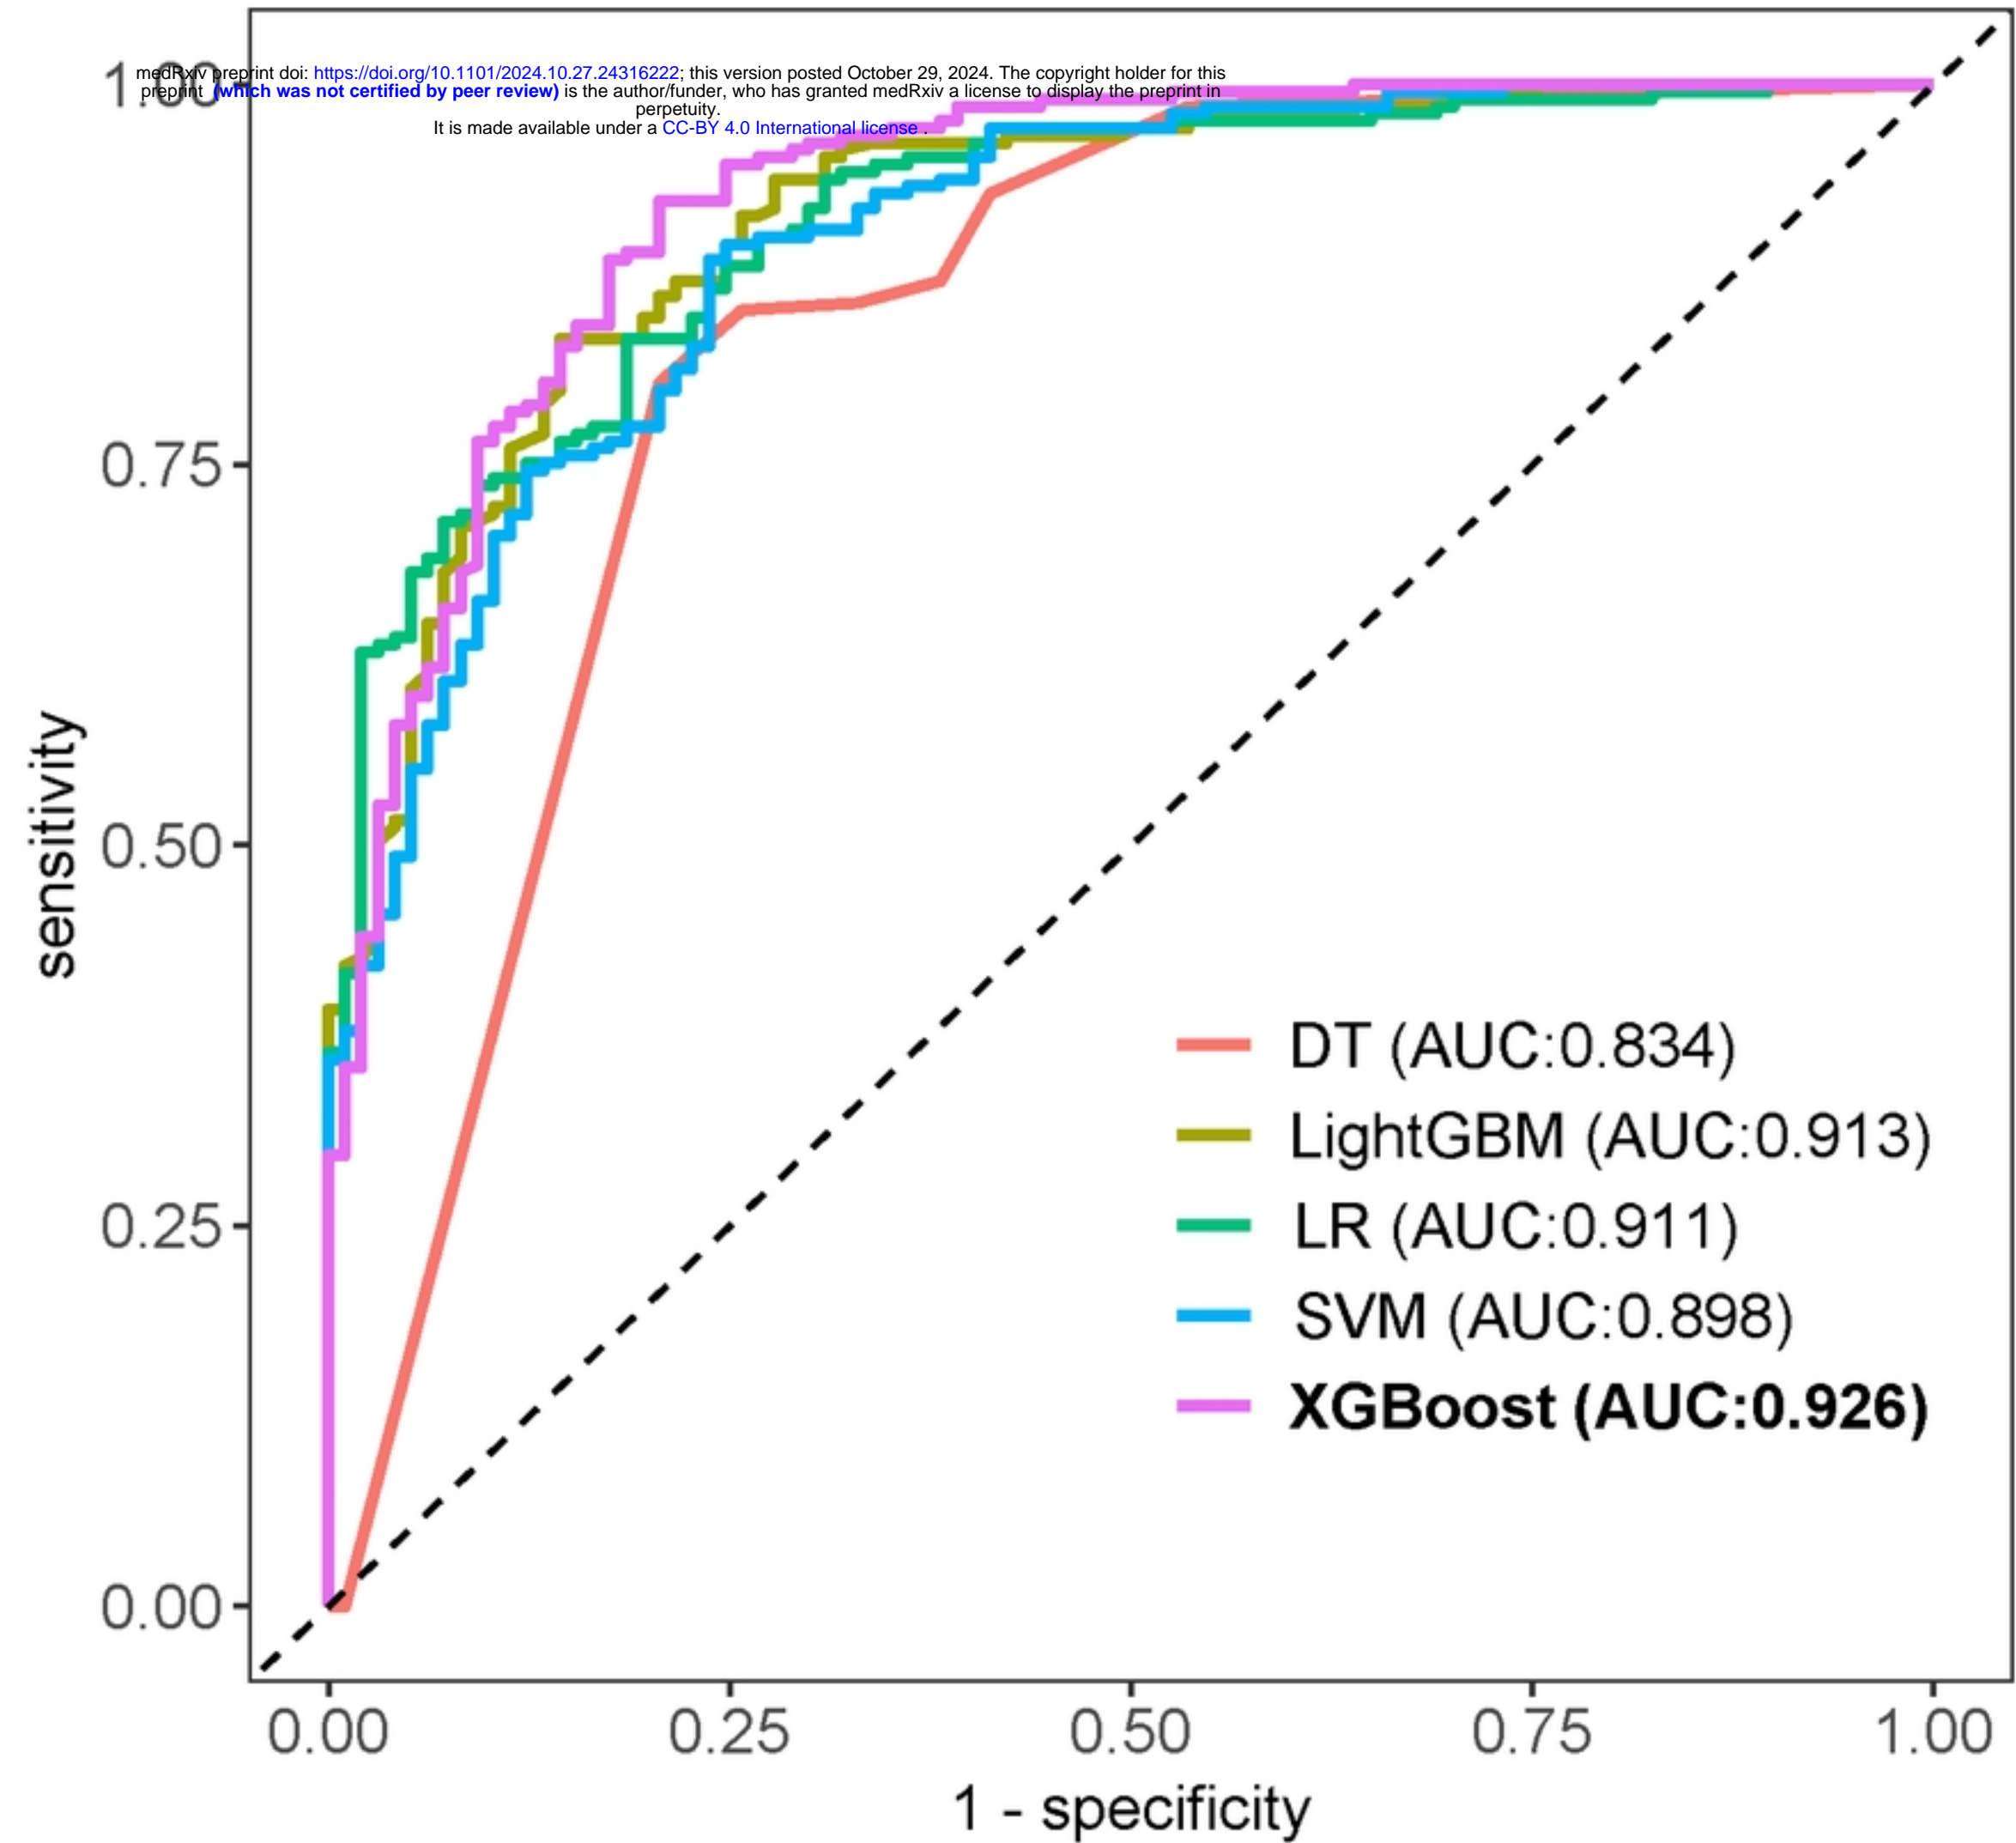

Fig4



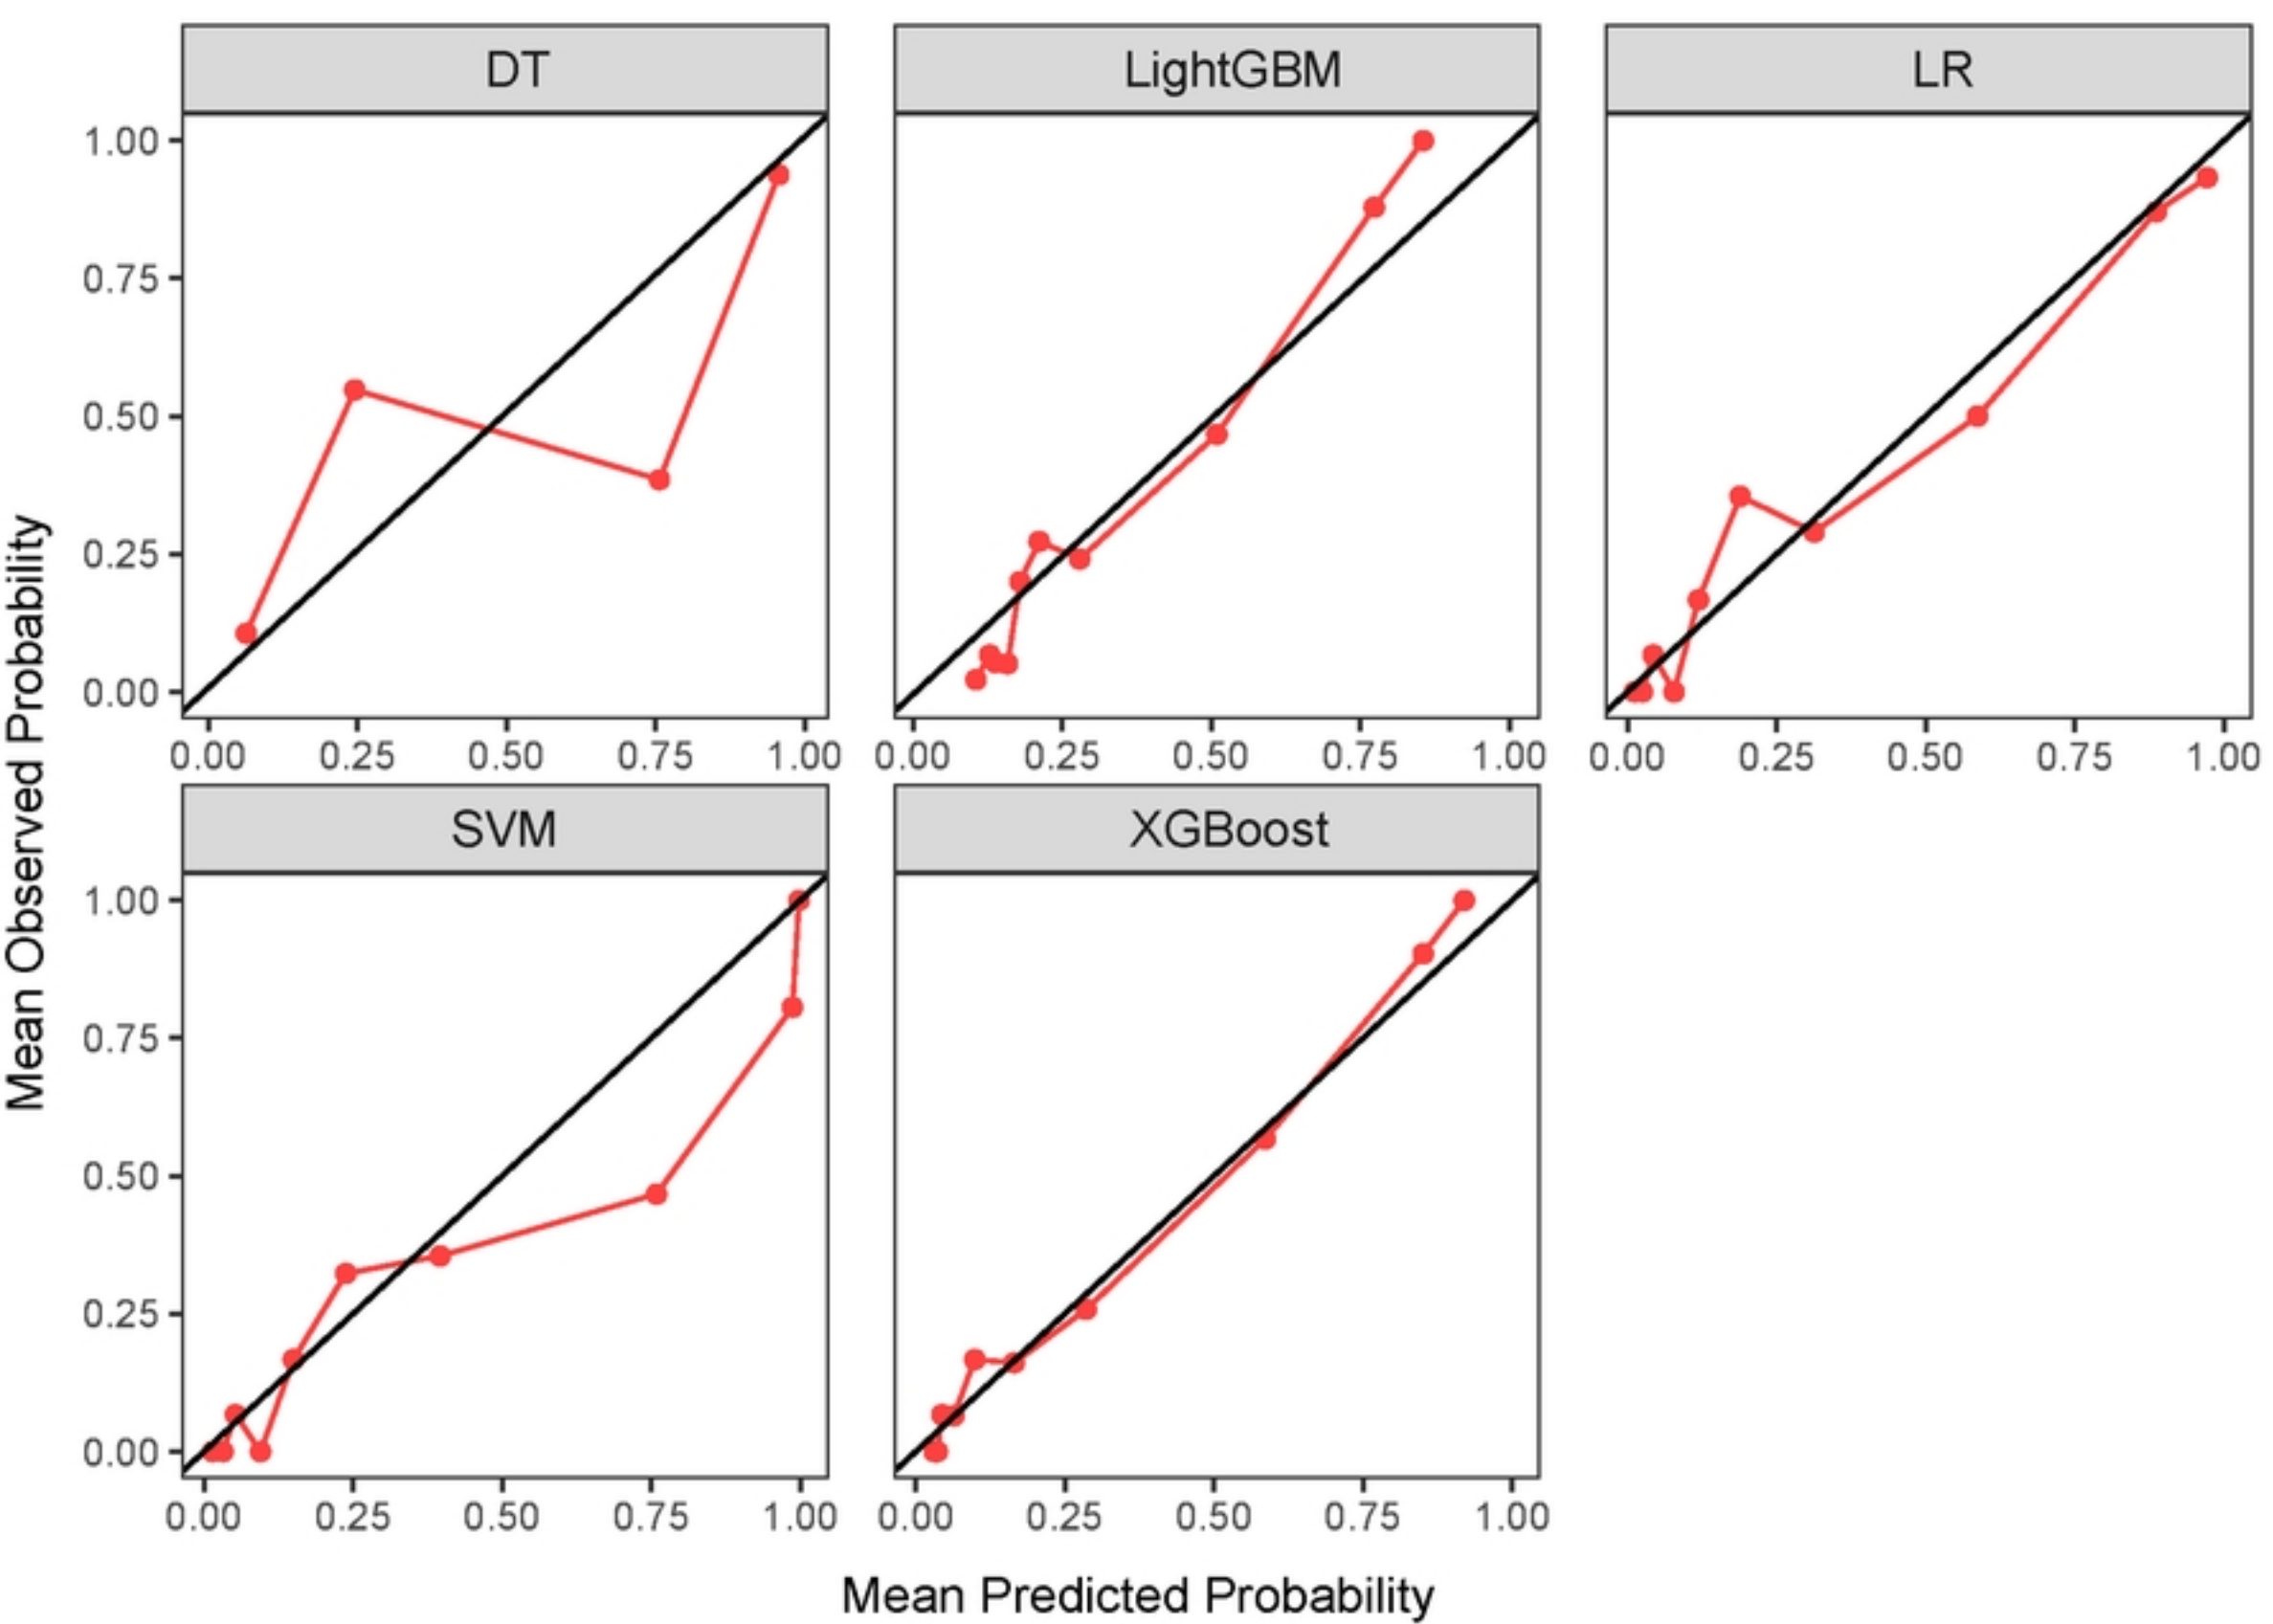

Fig5

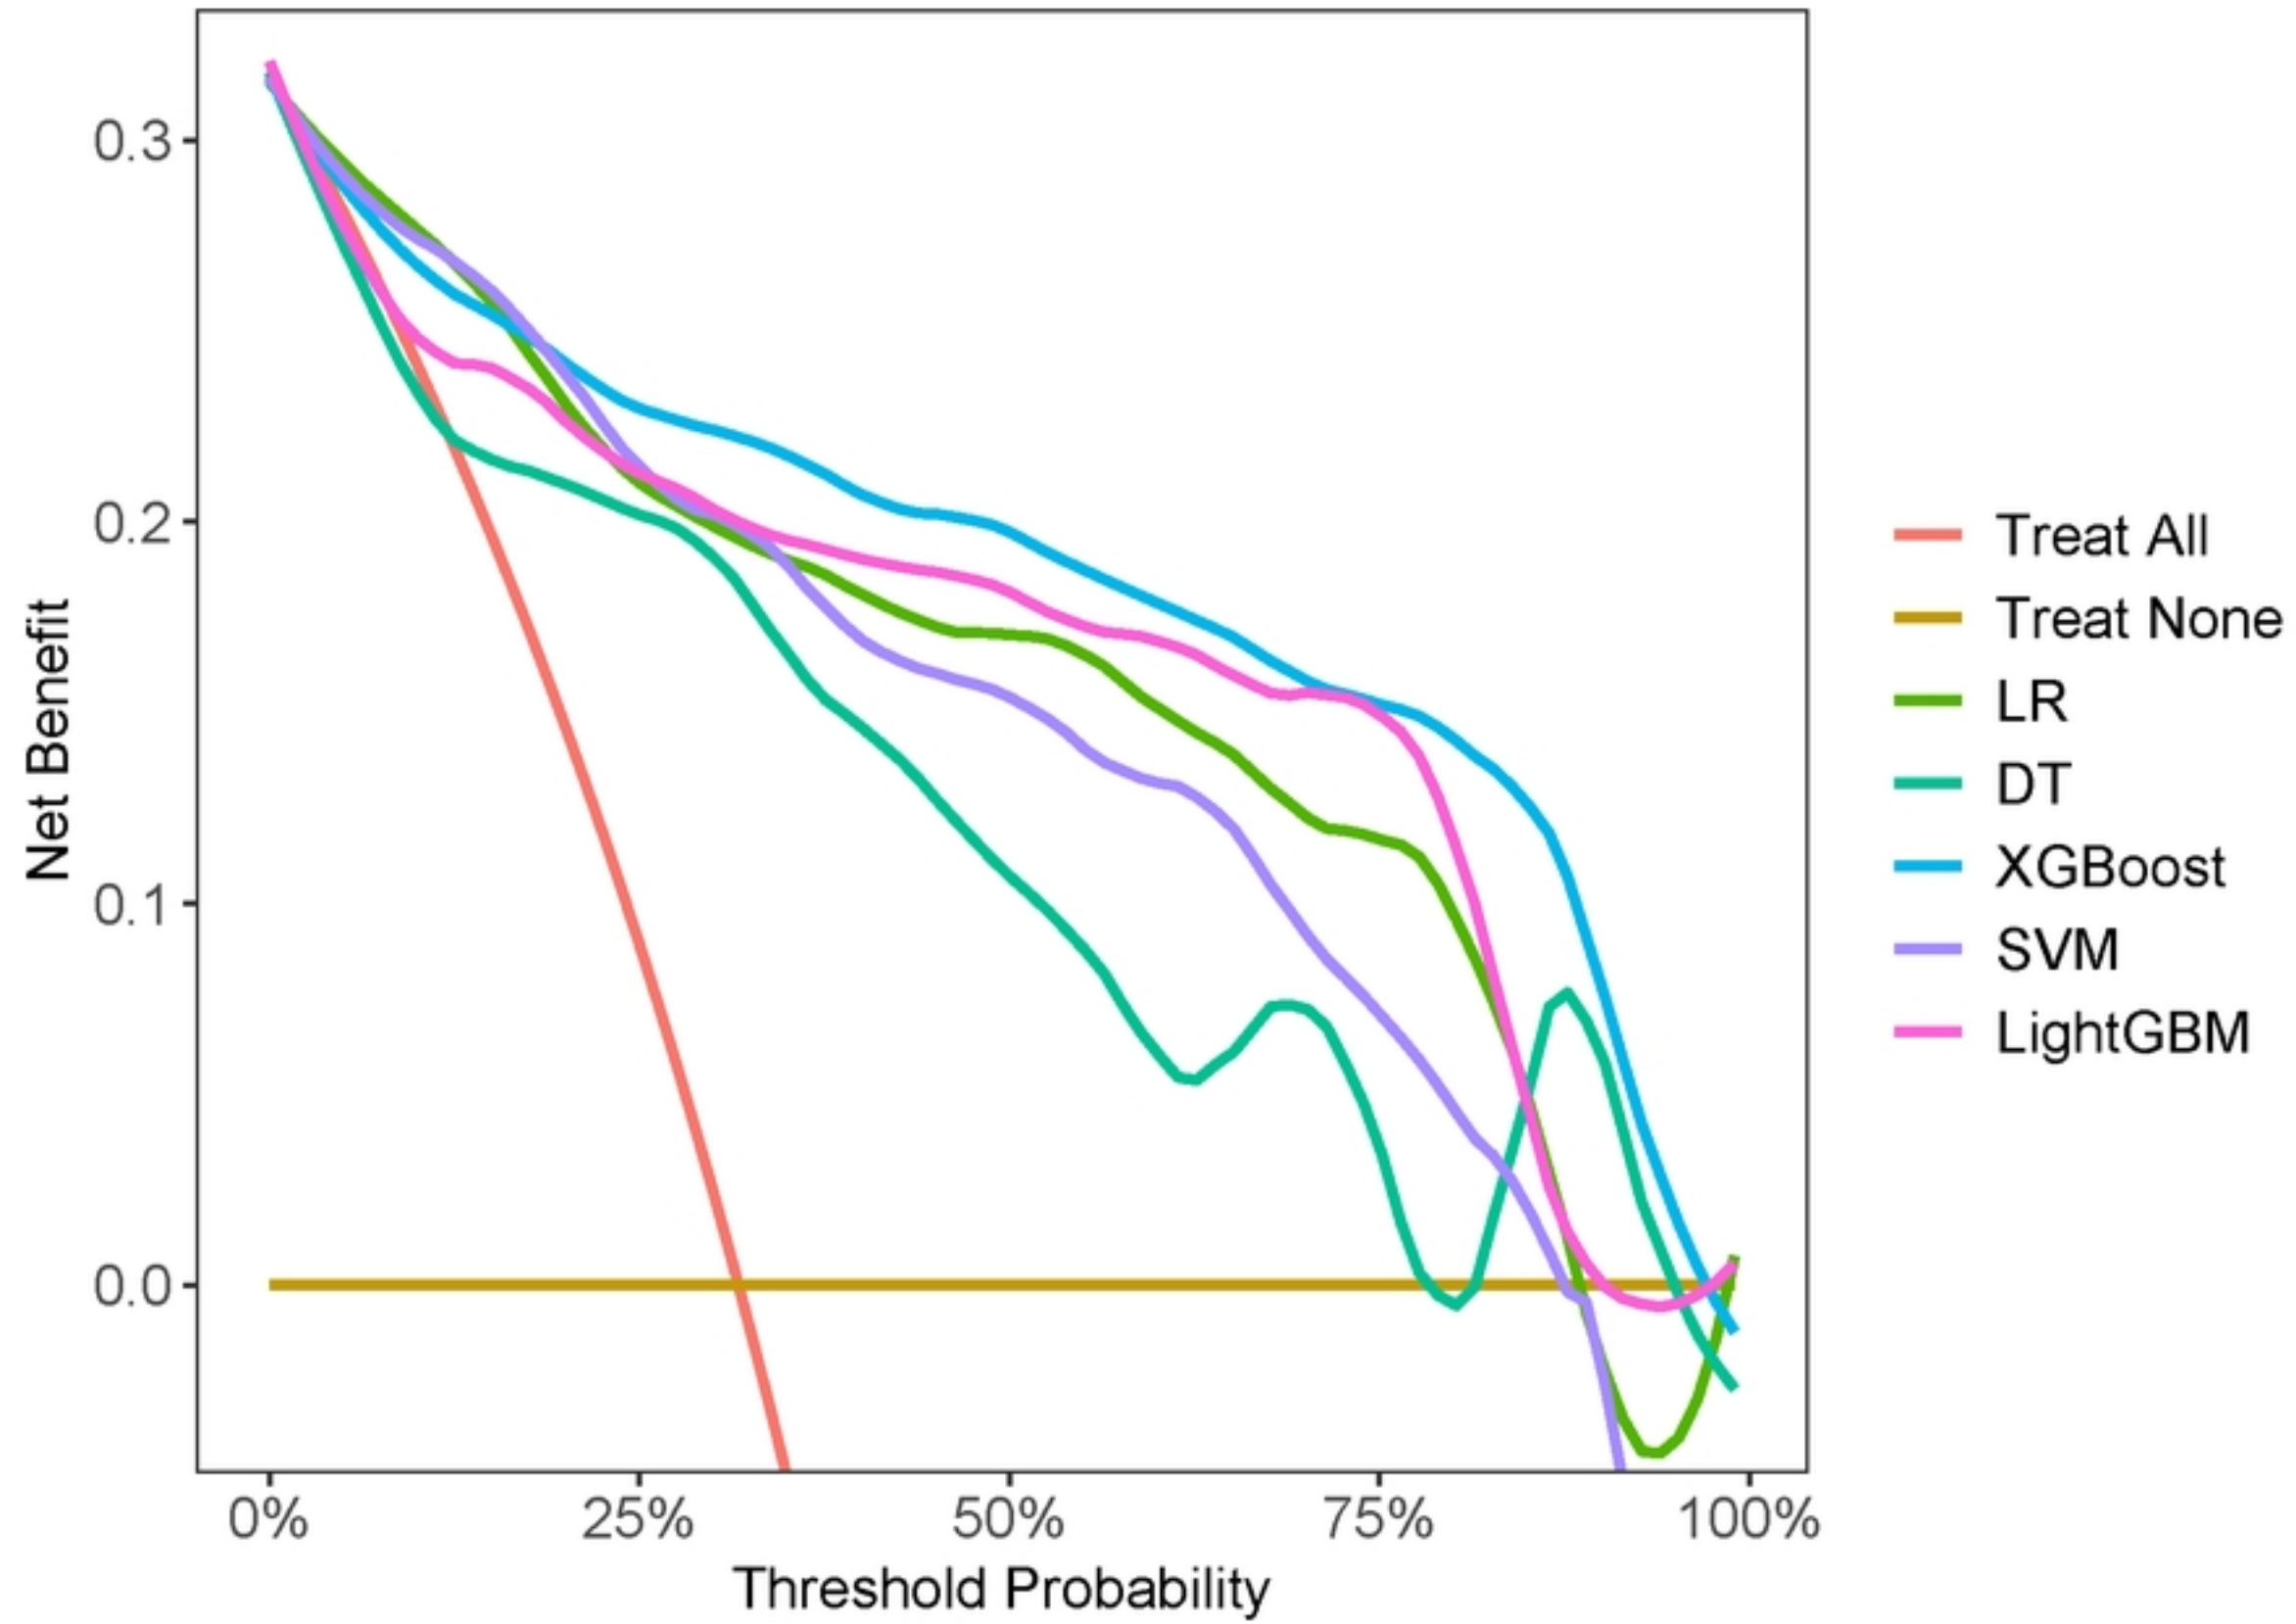

Fig6

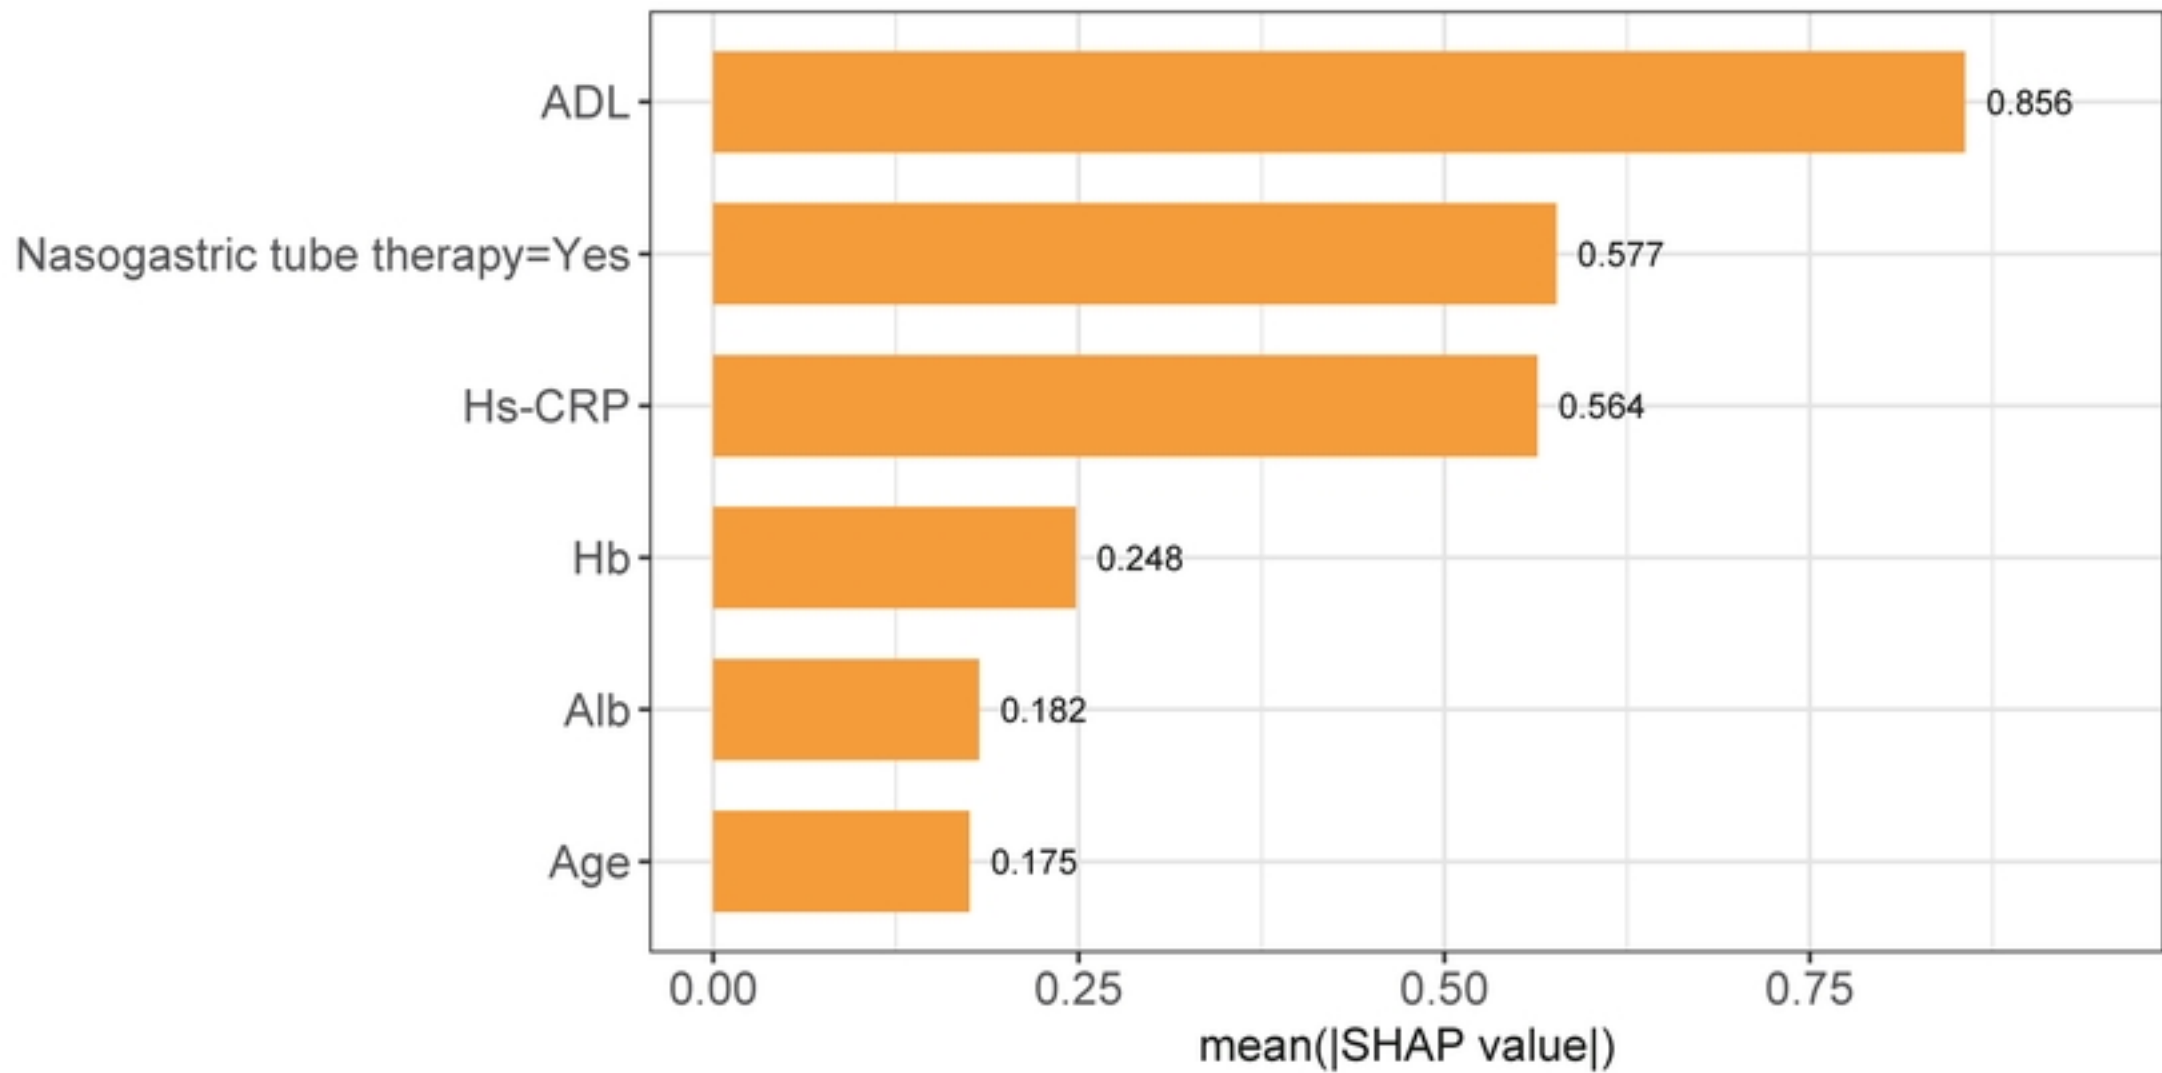

Fig7

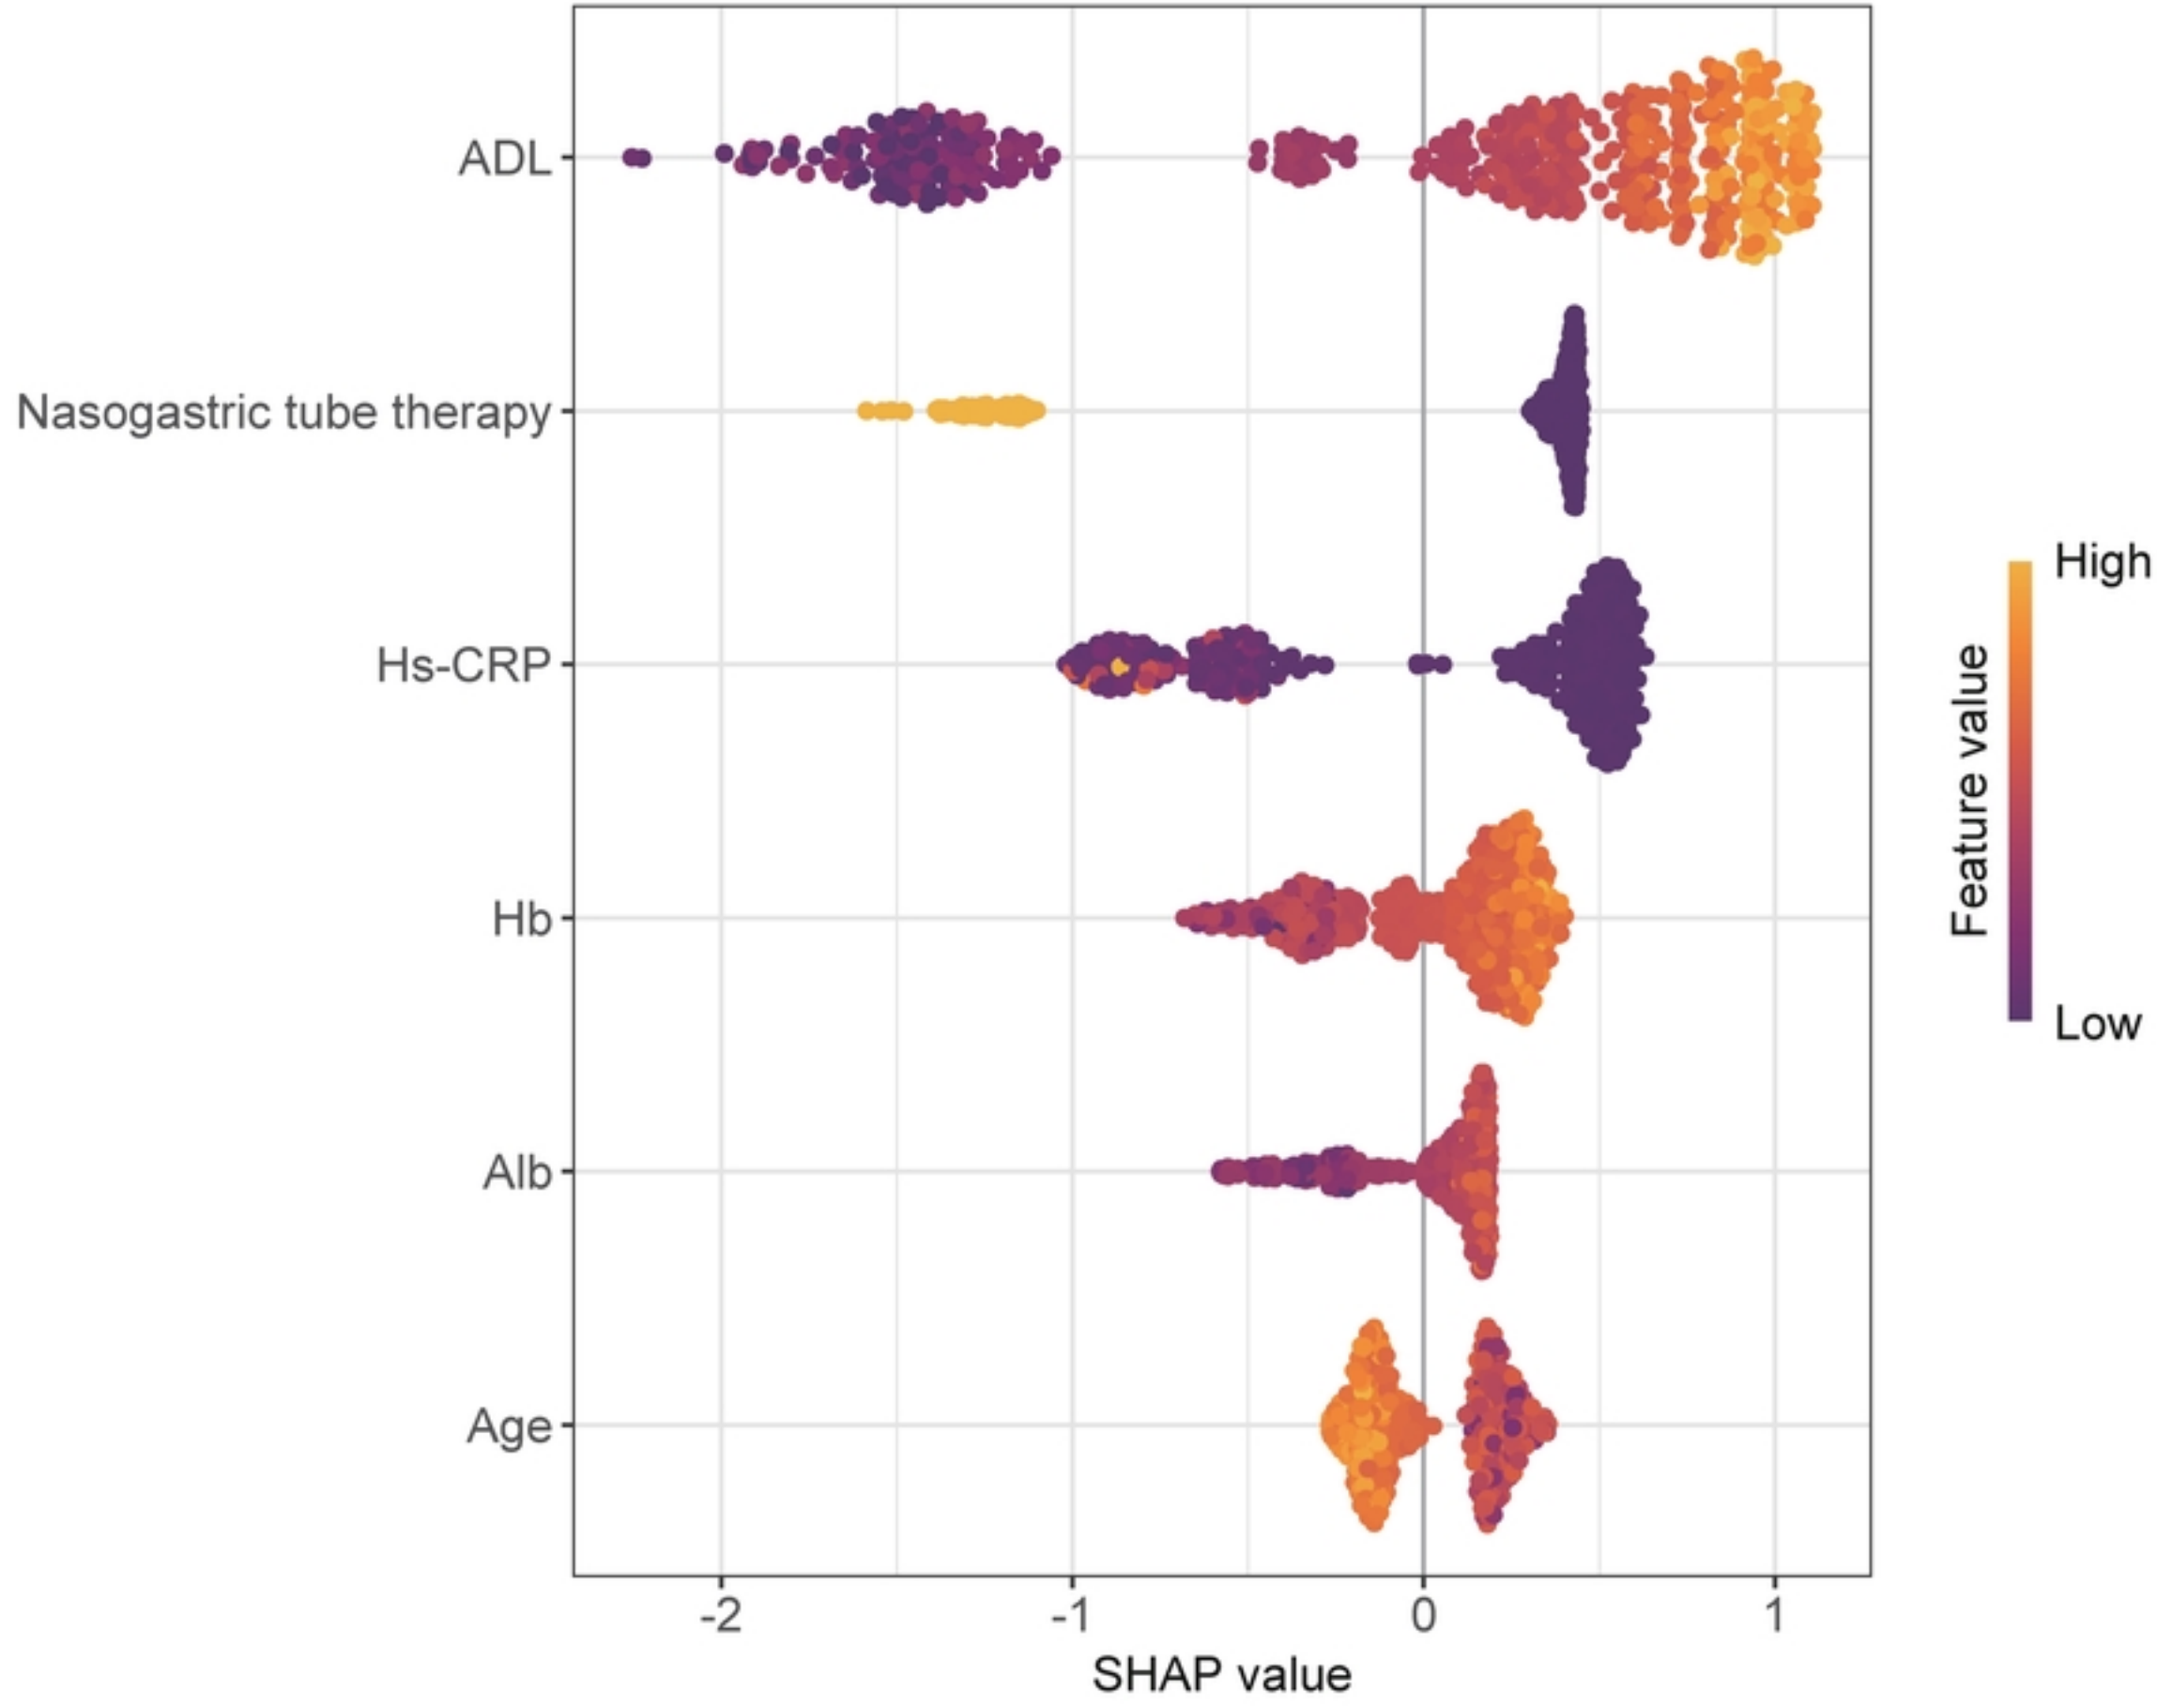

Fig8

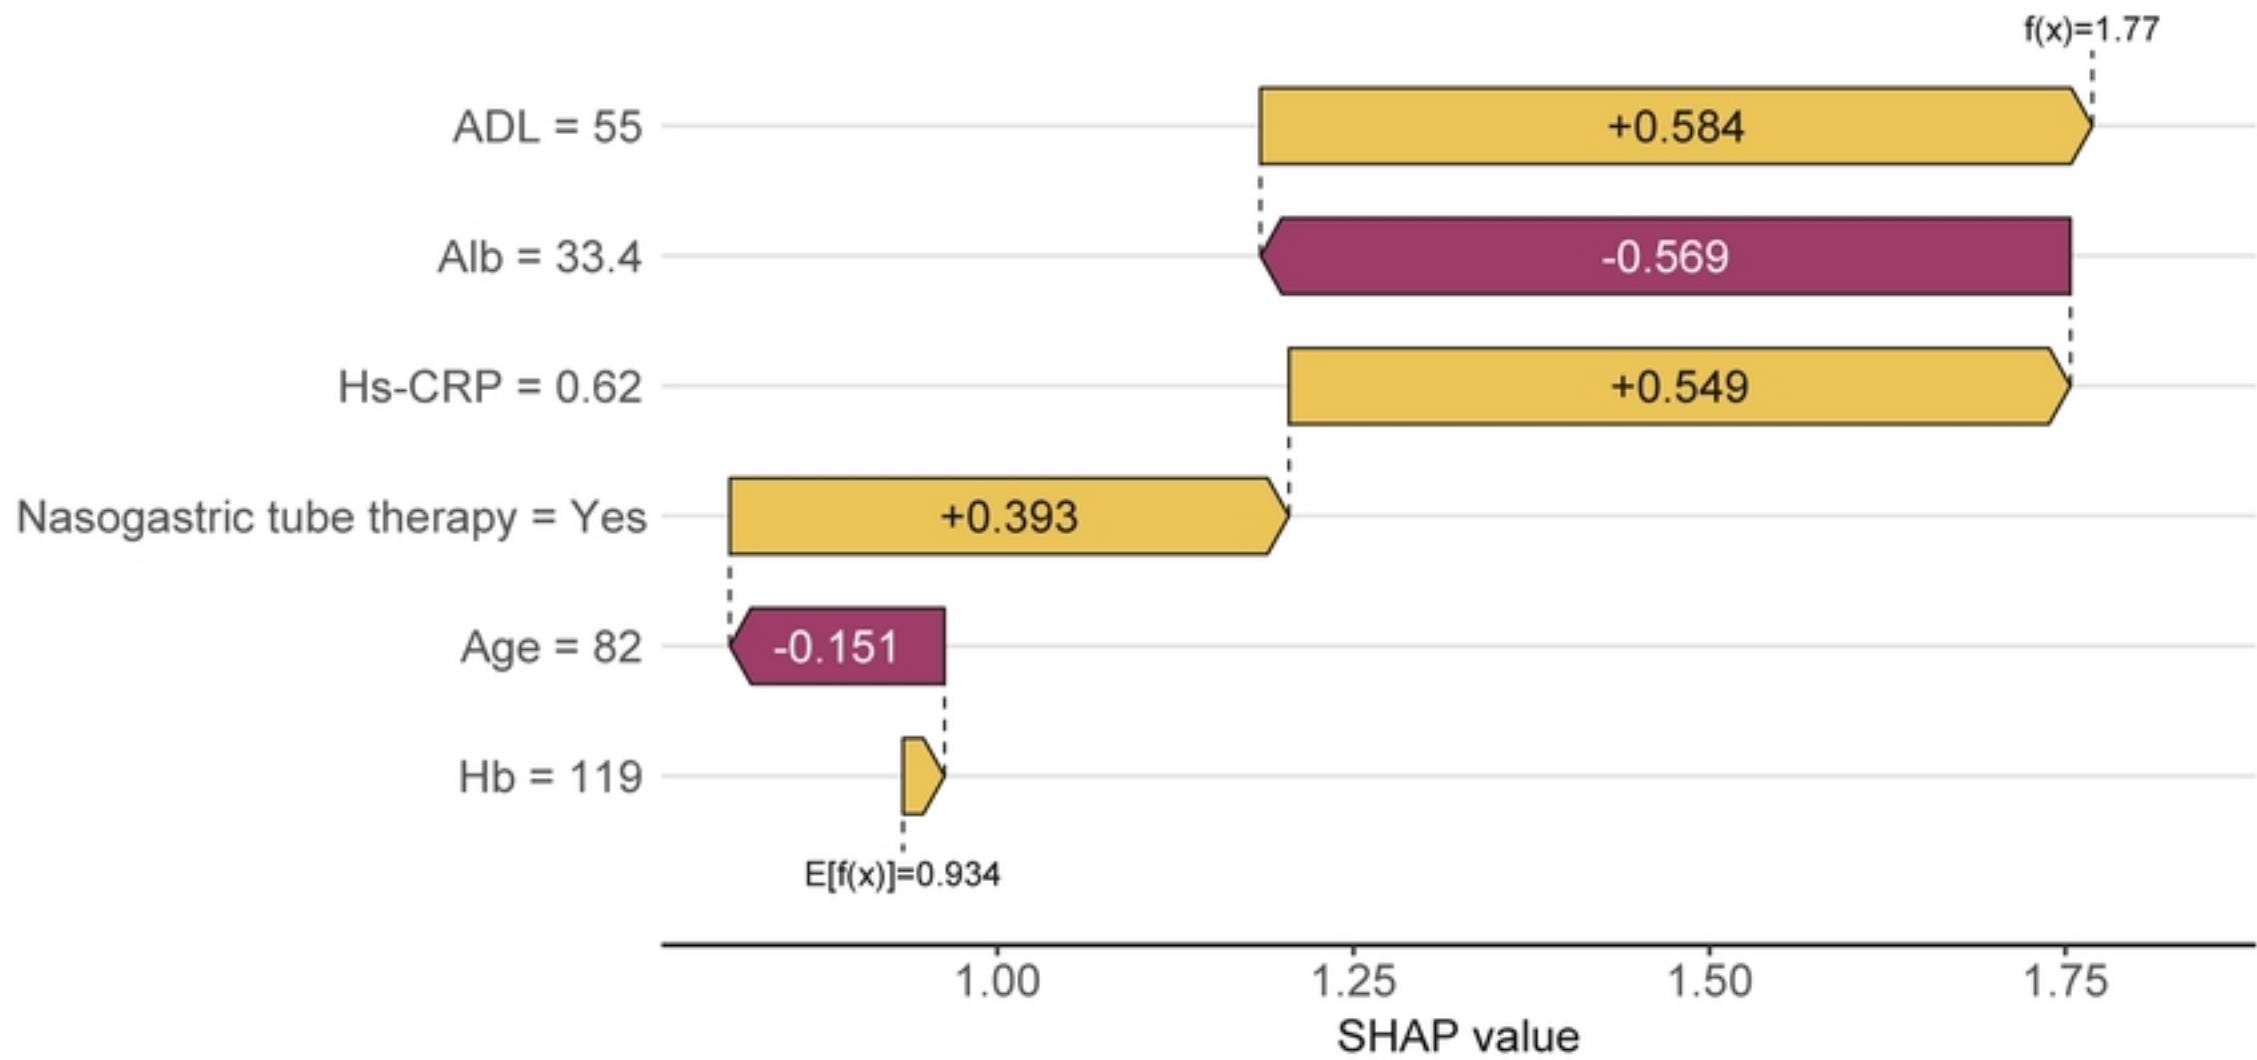

Fig9
